## Antibody-mediated immobilization of virions in mucus \*

Melanie A. Jensen <sup>†</sup>, Ying-Ying Wang <sup>‡</sup>, Samuel K. Lai <sup>§</sup>, M. Gregory Forest <sup>¶</sup>, and Scott A. McKinley <sup>†</sup>

**Abstract.** Antibodies have been shown to hinder the movement of Herpes Simplex Virus (HSV) virions in cervicovaginal mucus (CVM), as well as other viruses in other mucus secretions. However, it has not been possible to directly observe the mechanisms underlying this phenomenon, so the nature of virion-antibody-mucin interactions remain poorly understood. In this work, we analyzed thousands of virion traces from single particle tracking experiments to explicate how antibodies must cooperate to immobilize virions for relatively long time periods. First, using a clustering analysis, we observed a clear separation between two classes of virion behavior: Freely Diffusing and Immobilized. While the proportion of Freely Diffusing virions decreased with antibody concentration, the magnitude of their diffusivity did not, implying an all-or-nothing dichotomy in the pathwise effect of the antibodies. Proceeding under the assumption that all binding events are reversible, we used a novel switch-point detection method to conclude that there are very few, if any, state-switches on the experimental time scale of twenty seconds. To understand this slow state-switching, we analyzed a recently proposed continuous-time Markov chain model for binding kinetics and virion movement. Model analysis implied that virion immobilization requires cooperation by multiple antibodies that are simultaneously bound to the virion and mucin matrix, and that there is an entanglement phenomenon that accelerates antibody-mucin binding when a virion is immobilized. In addition to developing a widely-applicable framework for analyzing multi-state particle behavior, this work substantially enhances our mechanistic understanding of how antibodies can reinforce a mucus barrier against passive invasive species.

**Key words.** mucosal immunology, particle tracking, switching diffusion

**AMS subject classifications.** 92B05, 62-07, 60J70

**1. Introduction.** There are several mechanisms by which antibodies (Ab) produced by the immune system can interfere with and even prevent viral infection after an invasion. Antibodies have long been known to bind to surface epitopes on invading virions, rendering the pathogen ineffective either by blocking the epitope from binding to receptors on target cells, or signaling to other immune cells/molecules to inactivate the virus or destroy virus-infected cells. Recent experiments have revealed a previously under-appreciated mechanism: physical *hindrance* of virion motion and potentially the complete *immobilization* of virions in mucus secretions that lie on the epithelium [18, 11]. Specifically, the presence of virion-binding, Immunoglobulin G (IgG) antibody, was shown to directly decrease the mobility of the Herpes Simplex Virus (HSV) virions in human cervicovaginal mucus (CVM) [18], as well as Influenza and Ebola virus-like particles in human airway mucus [22]. An example of the

---

\*Submitted to the editors December 15th, 2018.

**Funding:** NIH R01GM122082-01, R21AI093242, U19AI096398, NSF DMS-1462992, DMS-1517274, CAREER Award DMR-1151477

<sup>†</sup>Department of Mathematics, Tulane University, New Orleans, LA ([mjensen1@tulane.edu](mailto:mjensen1@tulane.edu)).

<sup>‡</sup>Department of Biophysics, Johns Hopkins University, Baltimore, Maryland.

<sup>§</sup>Eshelman School of Pharmacy, University of North Carolina, Chapel Hill, Chapel Hill, NC.

<sup>¶</sup>Department of Mathematics, University of North Carolina, Chapel Hill, Chapel Hill, NC.

37 effect can be seen in Figure 1, where we display virion trajectories for two populations of  
38 HSV virions, originally studied in Wang et al. [18]. The left and right columns show virion  
39 movement in the presence of low and high Ab concentrations, respectively. The degree of  
40 activity in the low Ab concentration is notably higher.

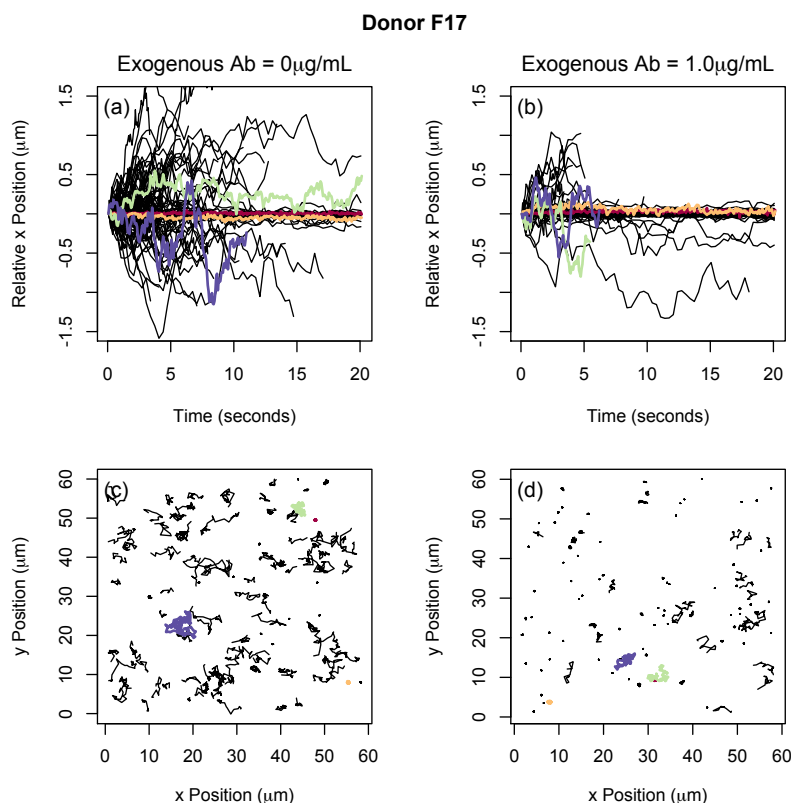

**Figure 1.** The trajectories of HSV virions for Donor F17 at exogenous antibody concentrations  $0\mu\text{g/mL}$  (left) and  $1.0\mu\text{g/mL}$  (right). **Top Row:** The displacement of HSV virions in the x-direction. The time indicated in the horizontal axis is shifted for each path so that  $t = 0$  corresponds to the moment the path is first observed. **Bottom Row:** All two dimensional HSV virion trajectories overlaid and plotted in a single frame. For all sub-figures the trajectory frame-rates are 15 observations per second.

41 The possibility of using IgG to hinder the motion of different viruses in mucus provides a  
42 novel strategy for immunologists to develop methods to prevent and/or treat viral infection [11,  
43 21]. Antibodies are too small to track individually (effective radius  $\sim 5$  nm), but population-  
44 scale experimental methods have shown that Ab are slightly less mobile in mucus than in  
45 phosphate-buffered saline [13]. The reduced diffusivity of Ab in mucus has been attributed to  
46 weak transient bonds between individual Ab and the polymeric microstructure of mucus, or  
47 “mucin mesh” [13]. Meanwhile many virions have been shown to diffuse unimpeded in mucus  
48 in the absence of a detectable Ab concentration [13, 18]. For this reason, the observation  
49 that virion mobility in CVM is impeded in the presence of Ab implies there must be some  
50 physico-chemical mechanism at work [18].

51 Recently the authors and collaborators have explored the possibility that Ab can work

52 in tandem with the mucin mesh to hinder diffusing virions. (See Figure 2 for an idealized  
53 schematic of the interactions.) In theory, as a virion diffuses through mucus, an array of  
54 Ab can accumulate on its surface. When a sufficient number of virion-bound Ab form low  
55 affinity bonds to the mucin mesh, the virion can become tethered and essentially trapped.  
56 This hypothesis was introduced by Olmsted et al. in 2001 [13] and confirmed by Wang et  
57 al. in 2014 [18] and by Newby et al. in 2017 [11]. In 2014, Chen et al. [2] introduced a  
58 stochastic/deterministic hybrid model for the immobilization of Human Immunodeficiency  
59 Virus (HIV) by IgG in CVM, and demonstrated the potential impact of the tandem effect  
60 of Ab-virion binding and Ab-mucus transient binding on the ability of viral populations to  
61 cross, enter, and pass through a thin mucosal layer. Later, Wessler et al. [20] used numerical  
62 simulations to explore combinations of Ab-virion and Ab-mucus reaction kinetics that produce  
63 an optimal effect. Newby et al. [11] further demonstrated that very low affinity Ab-mucus  
64 bonds optimize trapping of diffusing nanoparticles using experimental and simulated data  
65 along with providing theoretical arguments.

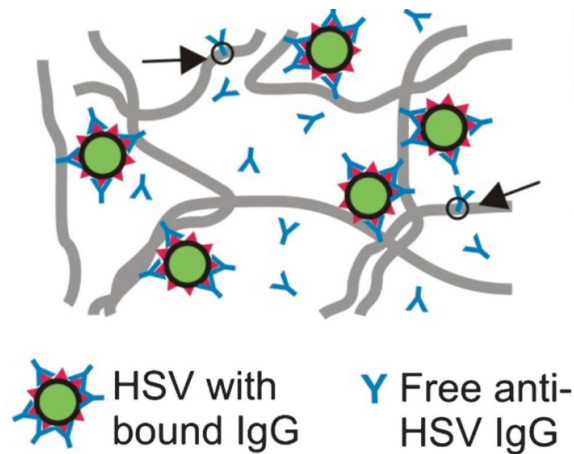

**Figure 2.** A schematic depiction of the proposed immobilization process of virions, green circles, by antibodies, blue 'Y's, in a mucosal medium. Virions become immobilized when 'enough' antibodies are bound to the virions and the mucosal fibers, gray lines. Arrows indicate Ab interacting solely with the mucin fibers. Figure originally presented in [18].

66 Underlying these mathematical models is a *Switching Diffusion Hypothesis*: that the chem-  
67 ical reactions responsible for virion (or nanoparticle) immobilization are reversible and, as a  
68 consequence, virions should switch between diffusive and immobilized states. When compared  
69 to the experimentally observable timescale of 10-20 seconds, the Ab-mucin kinetic rates are  
70 expected to be fast while the Ab-virion kinetic rates are expected to be slow (see Table 1).  
71 It is not clear, however, whether the state-switching between diffusion and immobilization  
72 should be on a faster or slower timescale than the observable 10-20 seconds.

73 In multiple papers [2, 20], the number of Ab that were bound to a given virion were  
74 tracked and, over the period of time that the number of virion-bound Ab was constant, the  
75 virion was assumed to have a state-dependent diffusivity:

76 (1.1) *Incremental Knockdown Hypothesis*:  $D(S(t), N(t)) = \alpha^{N(t)} D$ .

77 Here  $D$  is the diffusivity of the virion in mucus in the absence of Ab,  $N(t)$  is the number of  
 78 virion-bound Ab, and  $S(t)$  is the subset of Ab simultaneously bound to the mucin mesh. This  
 79 reduction in diffusivity is independent of  $S(t)$  because the number of simultaneously bound Ab  
 80 changes so rapidly (relative to the number of bound Ab), the virion only feels the average effect  
 81 of these changes, which is captured by the number of bound Ab,  $N(t)$ . The parameter  $\alpha$  can be  
 82 expressed in terms of the Ab-mucin binding and unbinding rates ( $m_{\text{on}}$  and  $m_{\text{off}}$ , respectively)  
 83 and the effective concentration  $[M]$  of binding sites on the surfaces of mucin fibers. If  $m_{\text{on}}[M]$   
 84 and  $m_{\text{off}}$  are very large, so that there are many on-and-off switches per second, then an effective  
 85 diffusivity arises with a so-called “knockdown factor”  $\alpha = m_{\text{off}}/(m_{\text{on}}[M] + m_{\text{off}})$  [2]. In this  
 86 way, we say that the Incremental Knockdown Hypothesis follows from assuming that the  
 87 dynamics is in a *Fast Switching Regime*. That is to say, in this modeling regime, one assumes  
 88 that [diffusion  $\rightleftharpoons$  immobilization] switching is faster than the times between experimental  
 89 observations and faster than simulation time steps. We depict a typical trajectory of a virion  
 90 under this hypothesis in Figure 3(a). A virion rapidly changes between the immobilized  
 91 (red) state and freely diffusing states (green). The resulting path has a reduced *effective*  
 92 *diffusivity* that is well-approximated by Equation (1.1), and the virion exhibits qualitatively  
 93 less movement than a virion predominately in the freely diffusing state (seen in blue).

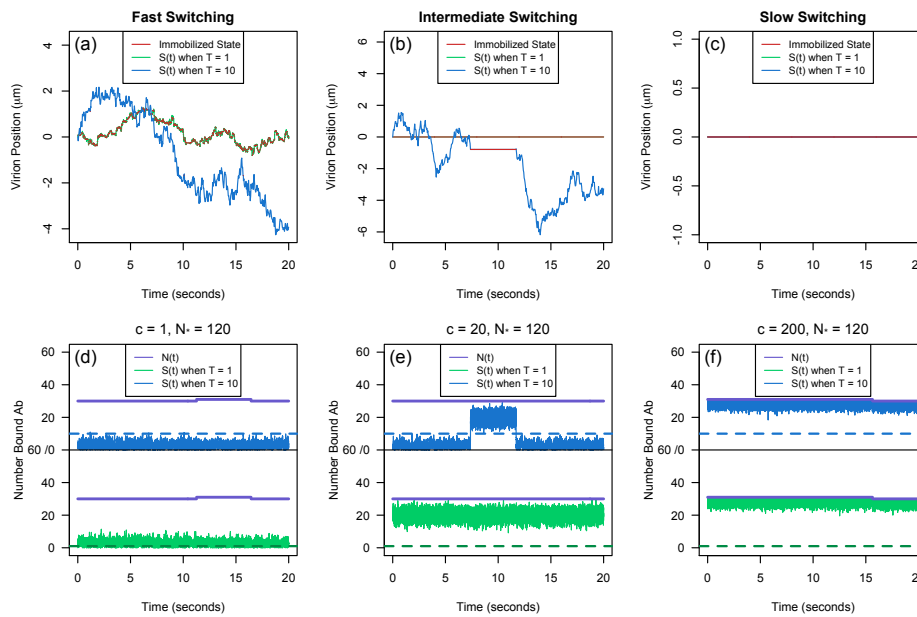

**Figure 3.** *Top row (a)-(c):* The path of a virion assuming it takes one (green trajectory) or ten (blue trajectory) simultaneously bound Ab for immobilization. Red intervals correspond to periods of immobilization. *Bottom Row (d)-(f):* The virion-Ab-mucin dynamics that govern the movement of the simulated virion directly above it. Within each frame, the number of bound Ab  $N(t)$  is shown by the purple trajectory and the subset of these Ab that are simultaneously bound to the mucin fibers  $S(t)$  assuming a low threshold,  $T = 1$ , and higher threshold,  $T = 10$ , shown by the green trajectory and blue trajectory, respectively. The binding rate cascade factor  $c$  increases from left to right:  $c = 1$ ,  $c = 20$  and  $c = 200$ , respectively. Other model parameters used in the simulation are  $([A]_0, [A]_{\text{exo}}, N_*) = (0.2\mu\text{g}/\text{mL}, 0.1\mu\text{g}/\text{mL}, 120)$ . The mathematical model is fully described in [subsection 2.4](#).

94 Recent particle tracking experiments now make it possible to analyze virion behavior as it  
95 is modulated by various concentrations of Ab [18]. In **Figure 1**, we display two populations of  
96 HSV virions diffusing in CVM with 0  $\mu\text{g}/\text{mL}$  and 1  $\mu\text{g}/\text{mL}$  concentrations of exogenous HSV-  
97 binding IgG. There is qualitatively less virion movement in CVM with higher concentrations  
98 of Ab, but, as we argue below using path-by-path analysis, the trajectories of individual  
99 virions appear to resemble either that of a strictly immobilized virion or a strictly freely  
100 diffusing virion. This absence of observable switches between immobilized and freely diffusing  
101 states might seem to ratify the fast switching hypothesis. However, closer analysis of the  
102 freely diffusing particles shows that the diffusivity of freely diffusing virions is essentially the  
103 same across all exogenous Ab concentrations. This contradicts the Incremental Knockdown  
104 Hypothesis, which predicts the diffusivity should decrease with increasing Ab concentration.  
105 While there are essentially no observable switches, and the diffusivity of the free population  
106 is not incrementally affected by Ab concentration, we find that the proportion of completely  
107 immobilized virions is unmistakably increasing with Ab concentration. (See also [18].) This  
108 suggests an alternative hypothesis: we are in a *Slow Switching Regime* where switching takes  
109 place fast enough (less than the incubation period of thirty minutes) so that the experiments  
110 display different movement patterns, but slow enough (more than twenty seconds) so that we  
111 do not see switches in the observational time window.

112 In this work, we develop and implement the tools necessary for making the preceding  
113 claims. To be specific, we use clustering analysis to partition virion paths into a few distinct  
114 behavioral patterns. We implement a Bayesian switch-point detection algorithm to assess the  
115 prevalence of switches in mobile virions. We develop a Markov chain model for virion-Ab-  
116 mucin interactions for use in our characterization of the dependence of virion motility on Ab  
117 concentration. A critical feature of this model is the possibility that virion immobilization  
118 requires multiple simultaneously surface bound Ab, and that a single virion-Ab-mucin binding  
119 event might lead to a cascade of such binding events, which would serve to enhance trapping.  
120 Using uncertainty quantification techniques we explore the limitations of the available data,  
121 but argue there is a reasonable parameter regime that is fully consistent with experimental  
122 observations.

## 123 **2. Data Collection, Statistical Methods, and Mathematical Model.**

124 **2.1. Data collection.** Single particle tracking data of HSV virions was collected from  
125 seven different CVM samples at five added doses of exogenously anti-HSV-1 IgG, (0, 0.033,  
126 0.1, 0.333, 1.0)  $\mu\text{g}/\text{mL}$  with an incubation period of half an hour to one hour. For each sample,  
127 the virions were tracked for a duration of 20 seconds. The  $x$ -position and the  $y$ -position of all  
128 traces were observed at a time interval of  $\delta = 1/15\text{s}$ . For a more detail description of the  
129 collection process see the Methods section in [18].

130 **2.2. Statistical tools for virion trajectory analysis.** We used standard statistical tech-  
131 niques to assess whether the behavior of each virion is consistent with the defining properties  
132 of Brownian motion (stationarity with Gaussian independent increments) and to infer physical  
133 parameters.

134 **2.2.1. Test for Gaussianity and independence of increments .** We used normal quantile-  
135 quantile (qqnorm) plots to qualitatively verify that the path statistics are approximately Gaus-

136 sian. The `qqnorm` plots for the increment processes had approximately linear relationships for  
 137 all particles indicating the  $x$  and  $y$  increment processes for all particles could be described as  
 138 Gaussian.

139 Noting that if a Gaussian process has uncorrelated increments then the increments are  
 140 independent, we tested for independence of increments by quantifying the statistical sig-  
 141 nificance of their correlation. Let  $\{U_i(k) := X_i(k\delta) - X_i((k-1)\delta)\}_{k=1}^n$  and  $\{V_i(k) :=$   
 142  $Y_i(k\delta) - Y_i((k-1)\delta)\}_{k=1}^n$  denote the  $i$ th particle's  $x$  and  $y$  increment processes, respectively.  
 143 For the  $i$ th particle, we estimated the correlation between the  $x$  and  $y$  increment processes  
 144 separated  $h$  time steps apart using the sample autocorrelation function,  $\mathcal{A}_i(h; U)$  and  $\mathcal{A}_i(h; V)$   
 145 used in the R programming language. If there are  $n$  increments of uniform duration  $\delta$  then  
 146 for a time lag of  $h\delta$

$$147 \quad (2.1) \quad \mathcal{A}_i(h; X) := \frac{\frac{1}{n} \sum_{k=1}^{n-h} (U_i((k+h)\delta) - \bar{U}_i)(U_i(k\delta) - \bar{U}_i)}{\frac{1}{n} \sum_{j=1}^n (U_i(j\delta) - \bar{U}_i)^2},$$

148 where  $\bar{U}_i := \frac{1}{n} \sum_{k=1}^n U_i(k\delta)$  [17]. We say the  $i$ th particle's increment processes are anti-  
 149 persistent (persistent) if both  $\mathcal{A}_i(h=1; X)$  and  $\mathcal{A}_i(h=1; Y)$  are below (above) the critical  
 150 value for a 95% significance level and independent otherwise.

151 **2.2.2. Mean-Squared Displacement.** The primary statistical tool for describing a pop-  
 152 ulation of microparticle paths is the so-called *ensemble* mean-squared displacement (MSD),  
 153 which we denote  $\langle \mathcal{M}(t) \rangle$ . To calculate it, we first compute a *pathwise* MSD for each trajectory  
 154 (denoted  $\mathcal{M}_i(t)$  for the  $i$ th path) and then take an average over these functions. If there are  
 155  $n$  steps that are uniform of duration  $\delta$ , then as defined in [15],

$$156 \quad \mathcal{M}_i(k\delta) := \frac{1}{n-k+1} \sum_{j=0}^{n-k} |X_i((j+k)\delta) - X_i(j\delta)|^2.$$

157 For  $t$  between the time points  $\{k\delta\}$  we define  $\mathcal{M}_i(t)$  by linear interpolation. The slope of the  
 158 MSD displayed on a log-log scale provides an estimate for each particle's diffusive exponent,  $\nu$ ,  
 159 in the large time regime ( $\mathcal{M}_i(t) \sim Ct^\nu$ ). Following standard particle tracking nomenclature,  
 160 an individual path is said to be Brownian if  $\nu = 1$ , subdiffusive if  $\nu \in (0, 1)$ , and stationary if  
 161  $\nu = 0$ .

162 **2.2.3. Effective Diffusivity.** A fundamental quantity to measure for a Brownian path is  
 163 its *diffusivity*  $D$ . If  $(X(t), Y(t))$  is the  $2d$  position of the particle at time  $t$ , then its diffusivity  
 164 is defined to be  $D := \lim_{t \rightarrow \infty} \mathbb{E}(X^2(t) + Y^2(t))/4t$ . For a Brownian path with  $n$  steps of  
 165 uniform duration  $\delta$ , the maximum likelihood estimator (MLE) for its diffusivity has the form

$$166 \quad (2.2) \quad D_{\text{eff}} := \frac{1}{4\delta n} \sum_{j=1}^n (U(j\delta)^2 + V(j\delta)^2),$$

167 shown in [Appendix A](#). We refer to  $D_{\text{eff}}$  as the path's *effective diffusivity*. We note that this  
 168 effective diffusivity is only a consistent estimator for  $D$  if the path has all the characteristics  
 169 of Brownian motion, namely stationary, independent, Gaussian increments. However, as seen

170 in Figure 4(a)-(c) there are many paths with anti-correlated increments. For such a process,  
171 “diffusivity” is not well-defined. Nevertheless we use  $D_{\text{eff}}$  as a descriptor for these paths  
172 because this serves the purpose to distinguish between the particles in two different states by  
173 the clustering methods described below.

174 For a given collection of  $N$  particles, the *ensemble effective diffusivity* is the weighted  
175 average effective diffusivity of the tracked particles in the sample, denoted  $\langle D_{\text{eff}} \rangle$ . When  
176 evaluating population statistics in particle tracking experiments, if particle paths are weighted  
177 independent of path length, then it has been shown that there is a bias toward highly mobile  
178 particles, further discussed in subsection 2.3.1,[19]. Based on that analysis, we report the  
179 effective diffusivity of an ensemble by taking an average weighted by path lengths. Let  $D_{\text{eff}}^i$   
180 denote the effective diffusivity of  $i$ th freely diffusing virion, which has path length  $n_i$ . Then

$$181 \quad (2.3) \quad \langle D_{\text{eff}} \rangle := \sum_{i=1}^N \omega_i D_{\text{eff}}^i \quad \text{where } \omega_i = \frac{n_i}{\sum_{j=1}^N n_j}.$$

#### 182 **2.2.4. Bias-corrected and accelerated percentile ( $BC_a$ ) confidence interval method.**

183 We constructed confidence intervals for ensemble statistics based on the bootstrapping  $BC_a$   
184 method due to its second order accuracy and invariance under transformations. See [4] for  
185 the formulation of confidence intervals using this method. We used the *boot* library in the R  
186 programming language to obtain the  $BC_a$  confidence intervals for the ensemble statistics as  
187 follows. First, we simulated 10,000 bootstrapped samples (with replacement) from an ensemble of  
188  $N$  tracked particles weighted by the particle path lengths. The  $BC_a$  confidence interval is  
189 then the usual confidence interval constructed using this population of (weighted) bootstrap  
190 samples.

#### 191 **2.3. Classification scheme for virion paths.**

192 For each donor and concentration, we employed a hierarchical clustering algorithm to separate the HSV virions into distinct clusters  
193 based on a set of pathwise statistics:  $x$ -increment ACF,  $y$ -increment ACF, and log 10 transform  
194 of the effective diffusivity. We defined the dissimilarity measure between pairs of virions  $i$  and  $j$   
195 by a weighted Euclidean distance  $d(i, j)$  with weights of 1/4, 1/4, and 1/2 for the differences in  
196  $\mathcal{A}_i(1; X)$ ,  $\mathcal{A}_i(1; Y)$ , and  $\log 10(D_{\text{eff}})$  respectively. The dissimilarity measure between clusters  
197 was set to be the average linkage. That is to say, the dissimilarity between clusters  $R$  and  $Q$   
198 is defined to be

$$199 \quad (2.4) \quad d(R, Q) = \frac{1}{|R||Q|} \sum_{i \in R, j \in Q} d(i, j).$$

200 Hierarchical clustering is an agglomerative clustering method [8]. The algorithm is initialized  
201 by setting each data point as a distinct cluster. During each iteration, clusters are merged  
202 together to minimize the dissimilarity between all clusters. The algorithm stops when all data  
203 points are in a single cluster. This process is depicted graphically through the dendrogram  
204 where clusters merge at a height equal to dissimilarity between them. We obtained the  $k$   
205 cluster by cutting the resulting dendrogram at the uniform height yielding  $k$  clusters.

206 In almost all cases, we set the number of clusters to  $k = 4$  and labeled them Freely  
207 Diffusing, Immobilized, Subdiffusive, and Outlier based on cluster ensemble statistics. We

208 introduced an Outlier class to account for those particles whose trajectories were marked  
209 by irregular behavior that seemed to be strongly influenced by non-biological factors (likely  
210 caused by experimental error). A few examples of each class are displayed in the Supplemental  
211 Information, [Figure SM1](#).

212 The Outlier class and Subdiffusive class were small in number and omitted from the  
213 remaining analysis.

### 214 **2.3.1. 'Frame-by-frame' method to compute empirical distribution of each cluster.**

215 It has been shown in [19] that fast moving particles are overestimated on shorter time scales  
216 in 2d particle tracking. This bias towards the fast moving particles arises due to individual  
217 fast particles leaving and reappearing in the focal plane as distinct traces and to new par-  
218 ticles entering and leaving the focal plane throughout the duration of the experiment. To  
219 minimize overestimating the freely diffusing population, we employed the 'frame-by-frame'  
220 method developed in [19] to compute the fraction of each population present in the data. The  
221 'frame-by-frame' method assigns each tracked particle a weight based on the number of frames  
222 the particle appears in the field of view, whereas in the conventional method each particle has  
223 the uniform weight of one. Under this weighting system, for a sample of size  $N$ , the weighted  
224 sample proportion of the  $i$ th state is given by

$$225 \quad (2.5) \quad \hat{p}_i = \sum_{k=1}^N \omega_k \delta_{ik} \quad \text{for} \quad \omega_k = \frac{n_k}{\sum_{k=1}^N n_i}$$

226 where  $\delta_{ik}$  is the Kronecker delta function.

227 **2.4. Mathematical model for asymptotic probability of immobilization.** We mathe-  
228 matically model the dynamics of a virion under the Switching Diffusion Hypothesis by the  
229 following SDE:

$$230 \quad (2.6) \quad dX(t) = \sqrt{2D(N(t), S(t))} dW(t)$$

231 where  $W(t)$  is standard 2d Brownian motion and the state-dependent diffusivity,  $D(N(t), S(t))$ ,  
232 depends on two time-dependent processes:  $N(t)$ , the number of antibodies bound to the sur-  
233 face of a focal virion at time  $t$ , and  $S(t)$ , the subset of these antibodies simultaneously bound  
234 to mucin binding sites at time  $t$ . We establish a threshold parameter  $T$ . A virion is defined to  
235 be *immobilized* if there are at least  $T$  simultaneously bound antibodies,  $S(t) \geq T$ , and defined  
236 to be *freely diffusing* if there are fewer than  $T$  simultaneously bound antibodies,  $S(t) < T$ .  
237 Under this convention, the time-dependent diffusivity is given by

$$238 \quad D(N(t), S(t)) = \begin{cases} D & 0 \leq S(t) < T \\ 0 & T \leq S(t) \leq N(t) \end{cases}$$

239 where the constant  $D$  is the diffusivity of the virion in mucus in the absence of Ab. In the  
240 following sections, we present a mathematical model that describes the asymptotic probability  
241 of the immobilized state when exposed to varying exogenous antibody concentrations.



242 **2.4.1. Model assumptions.** Based on the initial population clustering analysis, there  
 243 appears to a subpopulation of virions that do not interact with the antibodies. We define  $q$  to  
 244 be the probability that a given virion will interact with the Ab population. Second, for the sake  
 245 of simplicity, we assume that Ab-virion binding sites operate independently from each other.  
 246 However, we allow for conspiracy among the Ab in binding to the mucosal environment. Once  
 247 the virion has T simultaneously bound Ab-mucin-virion interactions ( $S \geq T$ ) the surface  
 248 bound antibodies might bind to the mucin fibers differently than if the virion was freely  
 249 diffusing. We parametrize this by a multiplicative change in Ab-mucin binding rate through  
 250 the introduction of the dimensionless parameter  $c$ . If  $c > 1$  the parameter has a cascade effect,  
 251 aiding in the immobilization process [3, 6, 7, 9, 11].

252 **2.4.2. A Markov Chain model for virion-Ab-mucin dynamics.** Let  $N_*$  denote the  
 253 number of independent Ab binding sites on the surface of an HSV virion. Antibodies bind  
 254 and unbind from these sites at rates  $k_{\text{on}}$  and  $k_{\text{off}}$ , respectively, with dissociation constant  
 255  $k_d := k_{\text{off}}/k_{\text{on}}$ .  
 256 Virion-surface-bound antibodies interact with the surrounding mucosal medium, binding  
 257 to and unbinding from mucin binding sites, at rates  $m_{\text{on}}$  and  $m_{\text{off}}$ , with dissociation constant  
 258  $m_d := m_{\text{off}}/m_{\text{on}}$ . The total Ab concentration  $[A]$  is the sum of the exogenous  $[A]_{\text{exo}}$  and  
 259 endogenous  $[A]_0$  Ab concentrations, and the total concentration of binding sites on mucin  
 260 fibers is denote  $[M]$ . See Table 1 for a comprehensive list of variables.

**Table 1**

*Parameters and known values incorporated in the model. \* indicates that the value has not been directly measured. The given value is chosen to be consistent with indirect observations.*

| Parameter                                                     | Symbol             | Value                   | Reference |
|---------------------------------------------------------------|--------------------|-------------------------|-----------|
| <b>Cell Properties</b>                                        |                    |                         |           |
| Initial Ab concentration in CVM                               | $[A]_0$            | Model Parameter         |           |
| Concentration of Ab binding sites on mucin fibers in CVM      | $[M]$              | unknown                 | *         |
|                                                               | $m_{\text{on}}[M]$ | $11.1s^{-1}$            | *         |
| <b>Molecule Properties</b>                                    |                    |                         |           |
| bnAb (IgG) Diameter                                           |                    | $0.011 \mu m$           | [18]      |
| HSV-1 Diameter                                                |                    | $\sim 0.180 \mu m$      | [18]      |
| Number of Ab binding sites on HSV-1                           | $N_*$              | Model Parameter         | *         |
| <b>Reaction Kinetics</b>                                      |                    |                         |           |
| Ab-mucin affinity (Knockdown Factor)                          | $\alpha$           | 0.9                     | [13]      |
| Ab-mucin binding rate                                         | $m_{\text{on}}$    | Unknown                 | *         |
| Ab-mucin unbinding rate                                       | $m_{\text{off}}$   | $100s^{-1}$             | *         |
| Ab-virion binding rate                                        | $k_{\text{on}}$    | $4.26e4 [M]^{-1}s^{-1}$ | [2]       |
| Ab-virion unbinding rate                                      | $k_{\text{off}}$   | $2.87e-4 s^{-1}$        | [2]       |
| Change in (Ab-virion)-mucin binding rate after immobilization | $c$                | Model Parameter         | *         |
| Number of Ab bond to mucus to immobilize a virion             | $T$                | Model Parameter         | *         |

261 We model the the Ab-virion interactions using a continuous time Markov Chain (CTMC)  
 262 assuming linear state transitions. If a given virion has  $n$  occupied (Ab-bound) surface binding

263 sites at time  $t$ , then the CTMC transition rates are given by

$$264 \quad (2.7) \quad n \begin{array}{c} \xrightarrow{(N_*-n)k_{\text{on}}[A]} \\ \xleftarrow{nk_{\text{off}}} \end{array} n + 1.$$

265 If there are  $s$  simultaneously bound Ab cross-linking the virion to mucin fibers at time  $t$  and  
 266  $n$  occupied virion-surface-binding sites, then the conditional Ab-mucin dynamics are modeled  
 267 by a CTMC with state transition rates

$$268 \quad (2.8) \quad s \begin{array}{c} \xrightarrow{(n-s)g(s)m_{\text{on}}[M]} \\ \xleftarrow{sm_{\text{off}}} \end{array} s + 1$$

269 for  $s \leq n$ , where

$$270 \quad (2.9) \quad g(s) = \begin{cases} 1 & s < T \\ c & s \geq T. \end{cases}$$

271 The function in [Equation \(2.9\)](#) quantifies the impact immobilization has on the rate at which  
 272 additional antibodies crosslink to the mucin fibers, i.e. the binding cascade effect, and results  
 273 in a non-linear transition rate when  $c \neq 1$ . We note that the transition  $(n, s) \rightarrow (n - 1, s - 1)$   
 274 is omitted from our analysis to facilitate with explicit likelihood calculations. This does not  
 275 qualitatively affect our results.

276 We show the impact the immobilization threshold,  $T$ , and the cascade factor,  $c$ , have on  
 277 the immobilization process in [Figure 3](#). Within each frame, it can be seen that a higher im-  
 278 mobilization threshold allows for longer freely diffusion periods, while across frames a higher  
 279 cascade factor leads to longer immobilized periods. In [Figure 3\(d\)-\(f\)](#) we simulated real-  
 280 izations of the processes  $(N(t), S(t))$  for various combinations of  $T$  and  $c$ . The number of  
 281 bound antibodies,  $N(t)$ , is displayed by the purple trajectory, and the number of simultane-  
 282 ously bound Ab with a low immobilization threshold,  $S(t)$  when  $T = 1$ , and with a higher  
 283 immobilization threshold,  $S(t)$  when  $T = 10$ , are shown by the green and blue trajectory,  
 284 respectively. Moving left to right, the factor by which the Ab-mucin binding rate changes  
 285 after immobilization increases,  $c = 1, 20$ , and  $200$ , respectively. In [Figure 3\(a\)-\(c\)](#), we show  
 286 how these processes dictate the movement of the virion. The virion with process  $(N(t), S(t))$   
 287 when  $T = 1$  is colored in green while  $(N(t), S(t))$  when  $T = 10$  is colored in blue. For both  
 288 trajectories immobilized periods,  $S(t) \geq T$ , are colored in red.

289 When immobilization does not affect the Ab-mucin binding rate, [Figure 3\(d\)](#), the process  
 290  $S(t)$  rapidly crosses the immobilization threshold (dashed line) resulting in a virion transition-  
 291 ing between states faster than the experimental time step, [Figure 3\(a\)](#), for both  $T = 1$  and  
 292  $T = 10$ . By increasing the cascade factor, [Figure 3\(e\)-\(f\)](#),  $S(t)$  remains above the immobiliza-  
 293 tion threshold, for observable periods. In this case, the simulated virions in [Figure 3\(b\)-\(c\)](#)  
 294 change states on the experimental time scale of twenty seconds and longer than twenty seconds,  
 295 respectively.

296 **2.4.3. Our approximation for the stationary probability of being immobilized.** We  
 297 assume that the antibody-virion dynamics are slow compared to the antibody-mucin dynamics.  
 298 To approximate a virion's long-term probability of being immobilized, we use a product of

two factors. The first is the steady-state distribution for the number of surface-bound Ab,  $N(t)$ . Then we compute the stationary distribution for the number of simultaneously bound Ab,  $S(t)$ , conditioned on each value  $N(t) = n$  (where  $n \in \{0, \dots, N_*\}$ ).

We introduce the notation  $b(x, n, p)$  for the binomial probability mass function. That is, if  $X \sim \text{Binom}(n, p)$ , then  $\mathbb{P}\{X = x\} = b(x, n, p)$ . Our approximation to the stationary distribution of immobilization can be understood as an average over the transitions of the fast process  $S(t)$ . Let  $\sigma$  denote the time a particle spends in the immobilized state, and  $\tau$  the time a particle spends in the freely diffusing state. Then our approximation takes the form

$$(2.10) \quad \tilde{\pi}([A]_{\text{exo}}) = q \sum_{n=T}^{N_*} \frac{\mathbb{E}(\sigma; T, c, n)}{\mathbb{E}(\sigma; T, c, n) + \mathbb{E}(\tau; T, n)} b\left(n; N_*, \frac{[A]_0 + [A]_{\text{exo}}}{k_d + ([A]_0 + [A]_{\text{exo}})}\right)$$

where

$$(2.11) \quad \mathbb{E}(\sigma; T, c, n) = \frac{1}{T m_{\text{off}}} \frac{\sum_{s=T}^n b(s; n, \frac{c m_{\text{on}}[M]}{m_{\text{off}} + c m_{\text{on}}[M]})}{b(T; n; \frac{c m_{\text{on}}[M]}{m_{\text{off}} + c m_{\text{on}}[M]})},$$

and  $\mathbb{E}(\tau; T, c, n) = \frac{1}{(n-T+1)m_{\text{on}}[M]} \frac{\sum_{s=0}^{T-1} b(s; n; \frac{m_{\text{on}}[M]}{m_{\text{off}} + m_{\text{on}}[M]})}{b(T-1; n; \frac{m_{\text{on}}[M]}{m_{\text{off}} + m_{\text{on}}[M]})}.$

The derivation of Equation (2.10) and Equation (2.11) rely on Markov Chain Theory and Renewal Theory and can be found in Appendix B.

It follows from the law of total expectation and the time-scale approximation, the expected time immobilized and expected time freely diffusing are respectively:

$$(2.12) \quad \mathbb{E}(\sigma) = \sum_{n=T}^{N_*} \mathbb{E}(\sigma; T, c, n) b\left(n; N_*, \frac{[A]}{k_d + [A]}\right);$$

$$\mathbb{E}(\tau) = \sum_{n=T}^{N_*} \mathbb{E}(\tau; T, c, n) b\left(n; N_*, \frac{[A]}{k_d + [A]}\right).$$

We say that a parameter vector is in the *Slow Switching Regime* if, for all tested exogenous Ab concentrations, the average times spent in the immobilized and diffusing states are more than 20 seconds. To be precise, we define

$$(2.13) \quad \Theta_{\text{slow}} := \{\vec{\theta} : \mathbb{E}(\sigma; [A]_{\text{exo}}, \vec{\theta}) > 20 \text{ and } \mathbb{E}(\tau; [A]_{\text{exo}}, \vec{\theta}) > 20 \text{ for all } [A]_{\text{exo}} \in [0, 1]\}.$$

**2.5. Switch point detection.** We develop an algorithm for detecting whether there is a *single* switch from diffusion to immobilization or immobilization to diffusion. The mathematical model presented in subsection 2.4, Equation (2.6), assumes complete immobilization but in fact immobilized virions exhibit spatial motion. Bernstein and Fricks in [1] account for this spatial motion by describing the bound state as a diffusing particle trapped in a potential well. Using an Expectation-Maximization algorithm they provide an evolving probability for each particle that it is in an immobilized or diffusing state. In contrast to the many-switch

326 paths considered by Bernstein and Fricks, we argue in [subsection 3.1.2](#) that the virion paths  
327 in our data set have at most one or two switches. We therefore developed and implement a  
328 Bayesian algorithm that is designed to identify the presence of a single switch point.

329 To derive a likelihood function, we extend our SDE model [Equation \(2.6\)](#) to include a  
330 path-specific trapping potential well, similar to [1]. Our extended model for a [diffusion  $\rightarrow$   
331 immobilization] switch is

$$332 \quad (2.14) \quad d\mathbf{X}(t) = \begin{cases} \sqrt{2D}d\mathbf{W}(t) & 0 \leq t \leq \tau \\ -\tilde{\kappa}(\mathbf{X}(t) - \mathbf{X}(\tau))dt + \sqrt{2D}d\mathbf{W}(t) & \tau < t \end{cases}$$
$$333 \quad \mathbf{X}(0) = 0$$

334

335 and for [immobilization  $\rightarrow$  diffusion], we have

$$336 \quad (2.15) \quad d\mathbf{X}(t) = \begin{cases} -\tilde{\kappa}(\mathbf{X}(t) - \mathbf{X}(0))dt + \sqrt{2D}d\mathbf{W}(t) & 0 \leq t \leq \tau \\ \sqrt{2D}d\mathbf{W}(t) & \tau < t \end{cases}$$
$$337 \quad \mathbf{X}(0) = 0$$

338

339 where  $\mathbf{X}(t) = (X(t), Y(t))^T$  and  $\mathbf{W}(t)$  is 2d Brownian Motion. These SDEs are derived from  
340 the Langevin equation for particles diffusing in a quadratic (Hookean spring) potential well.  
341 The constant  $\tilde{\kappa} = \kappa/\gamma$  where  $\kappa$  is the spring constant and  $\gamma$  is the viscous drag experienced by  
342 the particle. Due to the Fluctuation-Dissipation relationship,  $\gamma$  also appears in the diffusivity  
343 constant, which has the form  $D = k_B\mathcal{T}/\gamma$ , where  $k_B$  is Boltzmann's constant and  $\mathcal{T}$  is the  
344 temperature of the fluid. To obtain an analytically trackable likelihood function, we introduce  
345 simplifying assumptions that (1) the switch occurs exactly at an observation time point, and  
346 (2) there is no measurement error. We derive the likelihood function in [Appendix C](#).

347 We take a Bayesian approach to jointly estimate  $D$ ,  $\tilde{\kappa}$ , and  $\tau$  under both switching scenar-  
348 ios using a Gibbs sampling algorithm. If the 95% credible region for  $\tau$  is completely contained  
349 within the interval  $[0.1T_{\text{final}}, 0.9T_{\text{final}}]$  where  $T_{\text{final}}$  is the duration of a path, then we say  
350 that path is a candidate for switching. For both switching scenarios we estimated a false  
351 discovery rate for this criterion by simulating freely diffusing particles and setting the false  
352 discovery rate to the percent of simulated Brownian particles that were labeled as candidates  
353 for switching for the given switching model, [Equation \(2.15\)](#) or [Equation \(2.14\)](#). Similarly, we  
354 estimated the power of criterion through simulation. For both scenarios we simulated particles  
355 that switched states once, and set the power to the fraction of paths that were candidates  
356 for switching. See [section SM4](#) for more details on how these tests were constructed, and the  
357 results are presented in [subsection 3.1.2](#).

358 **2.6. Uncertainty quantification.** The model given by [Equation \(2.10\)](#) depends on the  
359 parameter vector  $\vec{\theta} = (T, c, N_*, q, [A]_0, k_d, m_{\text{off}}, \alpha)$ . In specifying the model to HSV-IgG data,  
360 [subsection 2.1](#), we set  $k_d = 0.8969$  [10] and  $\alpha = 0.90$  [13]. The Ab-mucin binding and  
361 unbinding rates have not been directly estimated. We assume they are fast compared to  
362 the experimental time scale and, for example, set  $m_{\text{off}} = 100s^{-1}$ . To assess the remaining  
363 parameters,  $\vec{\theta} = (T, c, N_*, q, [A]_0)$  – which are the immobilization threshold value, the  
364 binding cascade factor, the number of sites on the surface of virions, the virion-Ab interaction

365 probability, and the endogenous Ab concentration – we employed the numerical method of  
366 profile likelihoods [5, 16]. We used the numerically obtained relationships among parameters  
367 to obtain conditions on  $\theta$  such that the Switching Diffusion Hypothesis (in the Slow Switching  
368 Regime) is consistent with the data.

369 In order to quantify the model's error in predicting the immobilized fraction, for each  
370 donor  $i$ , we partitioned the paths according to exogenous Ab concentration  $\{[A]_j\}_{j=1}^5$ , and  
371 introduced the following residual function:

$$372 \quad (2.16) \quad \chi_i^2(\vec{\theta}) = \sum_{j=1}^5 N_{ij} \frac{(\tilde{\pi}([A]_j; \vec{\theta}) - \hat{p}_{ij})^2}{\tilde{\pi}([A]_j; \vec{\theta})(1 - \tilde{\pi}([A]_j; \vec{\theta}))},$$

373 where  $\tilde{\pi}([A]_j; \vec{\theta})$  denotes the model evaluated at  $[A]_j$  with parameters  $\vec{\theta}$  (as defined in Equa-  
374 tion (2.10)), while  $N_{ij}$  and  $\hat{p}_{ij}$  are, respectively, number of paths observed and the fraction  
375 that are immobilized in the  $j$ th subpopulation associated with donor  $i$ . Assuming a normal  
376 approximation to the binomial distribution, our residual function can be seen as the sum of  
377 five independent squared normal random variables, i.e. with a  $\chi^2$ -distribution with 5 degrees  
378 of freedom.

### 379 2.6.1. Numerical method of profile likelihoods to deduce parameter identifiability.

380 Because we assume normal approximation to the binomial distribution, working with a residual  
381 function is equivalent to using a likelihood function to define confidence intervals [14, 16]. For  
382 ease of notation in this section, we will suppress the dependence on  $i$  when considering the  
383 residual function  $\chi^2(\vec{\theta})$  for donor  $i$ .

384 To discuss identifiability of our model parameters, we use the nomenclature introduced  
385 by Raue in [16]. Our minimum residual estimator is defined to be  $\hat{\theta} := \operatorname{argmin}[\chi^2(\vec{\theta})]$ . The  
386 *likelihood-based confidence region of level  $\alpha$*  for  $\vec{\theta}$  is then defined to be

$$387 \quad (2.17) \quad \Theta_{\alpha, df} := \{\vec{\theta} : \chi^2(\vec{\theta}) - \chi^2(\hat{\theta}) < \chi^2(\alpha, df)\},$$

388 where  $\chi^2(\alpha, df)$  is the  $\alpha$  quantile of the  $\chi^2$  distribution with  $df$  degrees of freedom. When  
389 establishing a confidence interval for one of the parameters, we set  $df = 1$ . When establish a  
390 confidence region for multiple parameters, we set  $df$  equal to the number of parameters [14].

391 A parameter  $\theta_k$  is said to be *structurally identifiable* when there is a unique minimum of  
392  $\chi^2(\vec{\theta})$  with respect  $\theta_k$ , i.e., if there exists a unique  $\theta_k$  such that

$$393 \quad \theta_k = \left(\operatorname{argmin}_{\vec{\theta} \in \mathbb{R}^5} \{\chi(\vec{\theta})\}\right)_k.$$

394 Alternatively,  $\theta_k$  can be unidentifiable due to the structure of the model or because the  
395 quality and quantity of the data is insufficient in estimating  $\theta_k$ . For the former case, we say  
396  $\theta_k$  is *structurally unidentifiable* if the set

$$397 \quad \theta_{\min} := \{\vec{\theta} : \chi(\vec{\theta}) = \min_{\vartheta \in \mathbb{R}} \chi(\vartheta)\}$$

398 is not unique and contains at least two elements whose  $\theta_k$  components are distinct. This often  
399 occurs when there is a functional relationship  $\phi$  among  $\theta_k$  and at least one other parameter, say

400  $\theta_j$  such that  $\chi$  can be expressed directly in terms of  $\phi(\theta_k, \theta_j)$ . As for the latter data-restricted  
401 type of unidentifiability, we say  $\theta_k$  is *practically unidentifiable* when a unique minimum exists  
402 of  $\chi^2(\vec{\theta})$  with respect  $\theta_k$  but the likelihood based confidence interval for  $\vec{\theta}$  extends infinitely  
403 in increasing and/or decreasing values of  $\theta_k$ .

404 These definitions can be interpreted graphically using profile likelihoods. For residual  
405 function  $\chi^2(\vec{\theta})$  the *profile likelihood* of the  $k$ -th parameter defined to be

$$406 \quad (2.18) \quad \chi_{\text{PL}}^2(\theta_k) = \min_{\theta_j \neq k} [\chi^2(\vec{\theta})].$$

407 If  $\theta_k$  is a structurally identifiable parameter then  $\chi_{\text{PL}}^2(\theta_k)$  exceeds the threshold  $\Delta_\alpha$  for both  
408 increasing and decreasing values of  $\theta_k$  forming a deep valley around  $\hat{\theta}_k$ . If  $\theta_k$  is structurally  
409 unidentifiable the profile likelihood is flat. Lastly, if  $\theta_k$  is practically unidentifiable,  $\chi_{\text{PL}}^2(\theta_k)$   
410 obtains a unique minimum but does not exceed  $\Delta_\alpha$  in increasing and/or decreasing values of  
411  $\theta_k$ , forming a shallow valley around  $\hat{\theta}_k$ .

412 We further investigate unidentifiable combinations of parameters by extending [Equa-](#)  
413 [tion \(2.18\)](#) to profile parameter  $\theta_j$  and  $\theta_k$  simultaneously,

$$414 \quad (2.19) \quad \chi_{\text{PL}}^2(\theta_j, \theta_k) := \min_{\theta_i \notin \{j,k\}} \chi^2(\vec{\theta}).$$

415 Structural relationships between the two profile parameters manifest as flat valleys extending  
416 infinitely along the functional relationship in the contour plots of  $\chi_{\text{PL}}^2(\theta_j, \theta_k)$ . We note this  
417 flat valley only traces out the functional relationship  $\theta_j$  and  $\theta_k$  when the dimension of the  
418 parameter space is larger than 2.

### 419 **3. Results.**

#### 420 **3.1. Data do not support the Incremental Knockdown Hypothesis for a 20 second** 421 **time frame.**

422 **3.1.1. No evidence of fast switching: ensemble effective diffusivities of the free sub-**  
423 **population are the same regardless of exogenous Ab concentration.** For each Donor/Ab-  
424 concentration combination, the associated sample of virions contained a clear division among  
425 the tracked particles' MSD and ACF behavior. We used the classification scheme described  
426 in [subsection 2.3](#) to label each tracked virion as Immobilized, Freely-Diffusing, Subdiffusive or  
427 Outlier. The Immobilized class was characterized by low effective diffusivity ( $< 10^{-1} \mu\text{m}^2 \text{s}^{-1}$ )  
428 and either anti-persistent or uncorrelated increment processes. Meanwhile the Freely-Diffusing  
429 class had uncorrelated increment processes and effective diffusivities larger than  $0.2 \mu\text{m}^2/\text{s}$ .  
430 The Subdiffusive and Outlier classifications were rare and did not appear in all samples. For  
431 this reason, we removed these categories from the analysis but give a description of them in  
432 the SI. In [Figure 4\(a\)-\(c\)](#), we display the results of the classification for Donor F08 at 0, 0.1,  
433 and 1  $\mu\text{g}/\text{mL}$  added anti-HSV IgG in terms of  $D_{\text{eff}}$  and the average of the  $x$ - and  $y$ -ACF, as  
434 defined in [subsection 2.2.3](#) and [subsection 2.2.1](#) respectively. The clear separation of groups  
435 and locations of the clusters were qualitatively similar for the other donors (further figures  
436 included in the Supplemental Information).

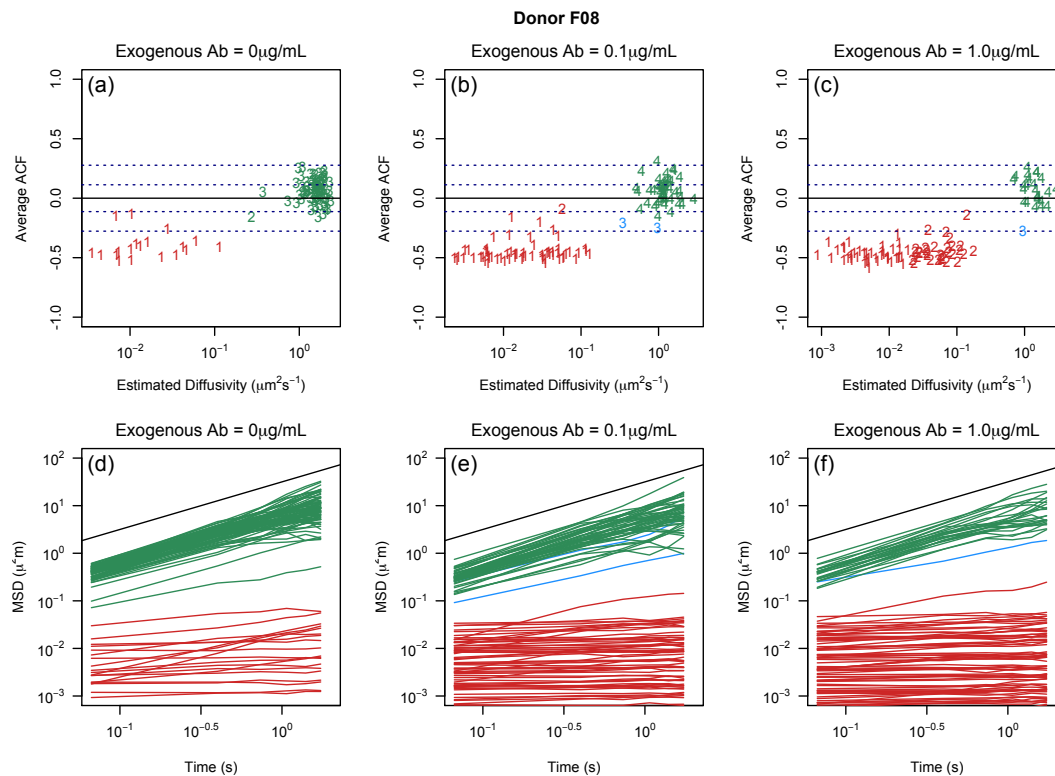

**Figure 4.** (a)-(c): The unweighted composition of the tracked virions for Ab concentration 0, 0.1 and 1.0  $\mu\text{g/mL}$ , respectively for Donor F08. Each point corresponds to a tracked virion with the given estimated diffusivity on a log 10 scale and average-ACF value. The character of points denotes clusters prescribed by the hierarchical clustering algorithm and color of the point denotes the class of the cluster. (d)-(f): The path-wise MSD for all the tracked virions for Donor F08 at  $[A]_{\text{exo}} = 0, 0.1, \text{ and } 1.00 \mu\text{g/mL}$ . The colors, green, red, and blue, denote the final clusters, freely diffusing, immobilized, and subdiffusive, respectively. Reference line with slope = 1, is denoted in black. (We note that the relative size of the different classes in this figure is not reweighted by path length as it is in the population counts reported in Figure 6.)

437 The pathwise MSDs for Donor F08 virions are displayed in Figure 4(d)-(f), and we note  
 438 the similarity of the Freely-Diffusing category of virions across all three panels. The Incre-  
 439 mental Knockdown Hypothesis would predict that freely diffusing virions would be “slower  
 440 and slower” in the presence of more and more Ab. However, we found that the diffusivities of  
 441 the Freely-Diffusing classes are consistent across all exogenous Ab concentrations. In Figure 5  
 442 we display this fact in two ways. In the left panel, we display the ensemble MSD averaged  
 443 over the Freely-Diffusing (green triangles) and Immobilized (red x’s) populations for each Ab  
 444 concentration. There is remarkable overlap within each group. Moreover, in the right panel,  
 445 we display the ensemble effective diffusivity for the Freely-Diffusing class at the various ex-  
 446 ogenous Ab concentrations for all donors. While there is variation in the effective diffusivity,  
 447 the overlapping  $BC_a$  confidence intervals indicate there is insufficient evidence to conclude  
 448 the effective diffusivity decreases with antibody concentration. (We provide 95% weighted  
 449 bootstrap confidence intervals for each estimate in the supplementary material Figure SM12).

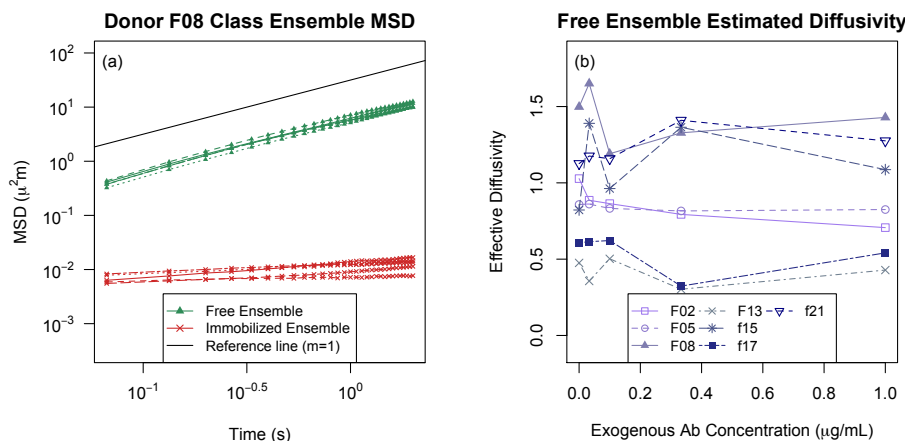

**Figure 5.** (a) Ensemble MSD of the Freely Diffusing class and the immobilized class at various exogenous antibody concentrations represented by the green and red curves, respectively, for Donor F08. The black line refers to the ensemble MSD of Brownian particles, slope equal to 1. (b) The estimated ensemble effective diffusivity of the free population versus exogenous antibody concentration where the shade and point style of the curve corresponds Donor. See Figure SM12 for the ensemble effective diffusivity with 95%  $BC_a$  confidence intervals.

450 We can express this finding in terms of a statistical test by comparing the weighted en-  
 451 semble effective diffusivity for the freely diffusing subpopulation at the two extreme Ab con-  
 452 centrations. We used a one-tailed paired difference hypothesis test:

$$453 \quad (3.1) \quad H_0 : \langle D_{\text{eff}}([A]_1) \rangle - \langle D_{\text{eff}}([A]_5) \rangle = 0, \quad H_A : \langle D_{\text{eff}}([A]_1) \rangle - \langle D_{\text{eff}}([A]_5) \rangle > 0.$$

454 for  $[A]_1 = 0.0 \mu\text{g/mL}$  and  $[A]_5 = 1.0 \mu\text{g/mL}$ . At an  $\alpha = 0.05$  level of significance, we failed to  
 455 find significant evidence that the ensemble effective diffusivity of the freely diffusing population  
 456 decreased when exogenous Ab concentration increased from zero exogenous Ab to the highest  
 457 concentration ( $t_6 = 0.2567$ ,  $p\text{-value} = 0.4030$ ). We report the results of paired difference tests  
 458 for all other combinations of the tested exogenous Ab concentration in Table SM10.

459 **3.1.2. Little evidence of switching on the experimental time scale.** We found little  
 460 evidence that virions switch between states on the experimental time scale of 20 seconds.  
 461 If tracked particles were typically experiencing many subtle switches, we expect that their  
 462 computed effective diffusivities would be diminished by a factor determined by the time spent  
 463 immobilized. Moreover, because there are distinct behavioral regimes, the distribution of  
 464 the increment processes are essentially a mixture of two Gaussian distributions (one for the  
 465 Immobilized state and one for the Freely Diffusing state). This would manifest itself as a  
 466 violation of linearity in  $\text{qqnorm}$  plots, which we do not see for the vast majority of HSV virion  
 467 paths.

468 While the  $\text{qqnorm}$  test can identify paths that might experience switches, they do not  
 469 affirm the presence of a switch. To this end, we developed a Bayesian method for identifying  
 470 whether there is a single switch point in a given virion path, described in the subsection 2.5.



471 We say a path of duration  $T_{\text{final}}$  is a candidate for switching if the 95% credible region for  $\tau$  was  
472 completely contained within the interval  $[0.1T_{\text{final}}, 0.9T_{\text{final}}]$ . The method was very effective  
473 on simulated data. When we applied the method to simulated Brownian motion (Freely-  
474 Diffusing), we found a 0.0119 and 0.0080 False Discovery Rate of [diffusion  $\rightarrow$  immobilization]  
475 switches and [immobilization  $\rightarrow$  diffusion] switches, respectively. On the other hand, 96.38%  
476 of the simulated [diffusion  $\rightarrow$  immobilization] paths were correctly identified as [diffusion  $\rightarrow$   
477 immobilization] switches, while 94.37% of the simulated [immobilization  $\rightarrow$  diffusion] paths  
478 were identified as [immobilization  $\rightarrow$  diffusion] switches (Table 2). Under this method, we  
479 found that 1.12% of the Freely-Diffusing class (1689 total tracked virions) were identified  
480 as [diffusion  $\rightarrow$  immobilization] switch candidates and 1.24% of the free populations were  
481 [immobilization  $\rightarrow$  diffusion] switch candidates. We therefore concluded that state switches  
482 occurred relatively rarely on the experimental time scale.

Table 2

*Fraction of Freely Diffusing virions that possibly switched states once by Donor.*

| Model             | Power  | False Discovery Rate | Virion switch candidates |
|-------------------|--------|----------------------|--------------------------|
| $D \rightarrow I$ | 0.9638 | 0.0119               | 0.0112                   |
| $I \rightarrow D$ | 0.9437 | 0.0080               | 0.0124                   |

483 **3.1.3. Fraction immobilized increases with exogenous antibody concentration.** While  
484 Ab concentration did not seem to affect the behavior of virions labeled Freely-Diffusing, it  
485 did have a significant effect on the fraction of virions that were placed in this class. This is  
486 consistent with the findings reported in [18]. We computed the Immobilized fraction for each  
487 Donor/Ab-concentration sample using the method discussed in subsection 2.3.1 and display  
488 the results in Figure 6, where each curve in the panel (b) corresponds to a different donor.  
489 While there is heterogeneity in the fraction of Immobilized virions across donors, there is  
490 a visible overall increase in proportion immobilized from 0 to 1  $\mu\text{g}/\text{mL}$ . This qualitative  
491 assessment is supported by statistical evidence provided by non-overlapping  $BC_a$  confidence  
492 intervals between the extreme exogenous Ab concentrations Figure SM11.

493 For each donor, the fraction of Immobilized virions increased with Ab concentration in the  
494 0 to 0.333  $\mu\text{g}/\text{mL}$  range and seemed to be saturated at higher Ab concentrations. We tested  
495 the significance of this observed trend by fitting a negative exponential growth model with  
496 predictors: exogenous antibody concentration and individual effect terms relative to Donor  
497 F08. Let  $\chi_k$  be the the indicator function that a virion in the  $k$ th donor sample is in the  
498 immobilized state. Our negative exponential growth model takes the form

499 (3.2) 
$$P(\chi_k = 1) = (\beta_0 + \beta_k) - e^{-(\alpha_0 + \alpha_{\text{exo}}[A]_{\text{exo}}) + \alpha_k}$$

500 where  $\alpha_k$  and  $\beta_k$  are the effect terms for the  $k$ -th donor. We found the exogenous antibody  
501 concentration ( $\alpha_{\text{exo}} = 15.920$ ,  $p$ -value < 0.001), the growth rate due to the baseline donor  
502 ( $\alpha_0 = -0.8427$ ,  $p$ -value = 0.0043), and baseline saturation probability ( $\beta_0 = 0.9138$ ,  $p$ -value <  
503 0.0001) were statistically significant in predicting the immobilization probability, whereas the  
504 constants accounting for deviations from the baseline due to donor sample were not significant.  
505 The model was fit using the R command `nls()` with the minimization algorithm set to Gauss-  
506 Netwon's method.

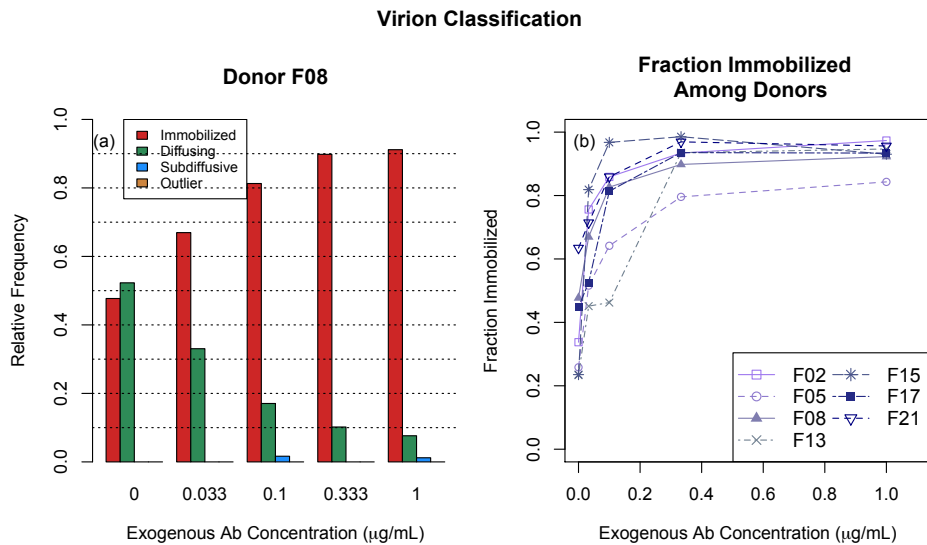

**Figure 6.** (a) The weighted proportion of the 4 classes for Donor F08 at the various tested exogenous Ab concentrations. (b) Weighted proportions of Immobilized virions for each donor. See Figure SM11 for plots with 95%  $BC_a$  confidence intervals.

507 **3.2. The Simple Linear Model predicts fast switching.** The results from subsection 3.1  
 508 provide evidence against the hypothesis that switching between the diffusing and immobi-  
 509 lized states is fast relative to the experimental time scale. Our next goal was to determine  
 510 whether there is a parameter regime that predicts slow switching while simultaneously being  
 511 consistent with the exogenous Ab-dependent Immobilization data displayed in Figure 6. This  
 512 analysis depends strongly on two assumptions: (1) whether one virion-bound Ab is sufficient  
 513 to crosslink the virion to mucin, and (2) whether Ab-mucin binding rates increase when the  
 514 virion is immobilized, the so-called cascade effect. We introduced two variables –  $T$ , the  
 515 threshold number, and  $c$ , the cascade factor – in our general model to account for these possi-  
 516 ble effects. In recent works, it has been assumed either that  $T = c = 1$  [2, 11] or that  $T = 1$   
 517 and  $c > 1$  [20]. We refer to  $T = c = 1$  as the Simple Linear Model (SLM) because all the  
 518 CTMC transition rates are linear. By computing the expected durations of the immobilized  
 519 and diffusing states (Equation (2.12), derivation in Appendix B.2), we were able to show that  
 520 the data is not consistent with the SLM, or any case where  $T = 1$ .

521 We say a model is *consistent* with the observed data for a specified donor if there exists a  
 522 parameter vector  $\vec{\theta}$  that is within the 95% confidence region for the Immobilized Fraction data  
 523 (denoted  $\Theta_{\alpha,df}$ , defined in Equation (2.17)) and also predicts expected state times larger than  
 524 20 seconds (denoted  $\Theta_{slow}$ , defined in Equation (2.13)). In Figure 7, we demonstrate that the  
 525 SLM is not consistent with the data for Donor F08. In the left panel, we show a 2d profile  
 526 likelihood plot for the endogenous Ab concentration  $[A]_0$  and number of virion surface binding  
 527 sites  $N_*$ . For each  $([A]_0, N_*)$  pair, we calculated the best fit for the remaining parameter  $q$ , the  
 528 virion-Ab interaction probability, and display the residual value by the shading (darker means  
 529 better fits). The black region represents the 95% confidence region for these two parameters.

530 We uniformly sampled this confidence region,  $\Theta_{0.05,3}$ , and displayed the predicted Immobilized  
 531 Fraction curves for these parameter samples in panel (b) and the Ab-concentration dependent  
 532 expected state durations in panel (c). We note that all parameter combinations in  $\Theta_{0.05,3}$   
 533 had diffusing states that lasted less than 0.1 seconds for all values of  $[A]_{\text{exo}}$ . We repeated this  
 534 analysis for all donors and in each case found that  $\Theta_{0.05,3} \cap \Theta_{\text{slow}} = \emptyset$ .

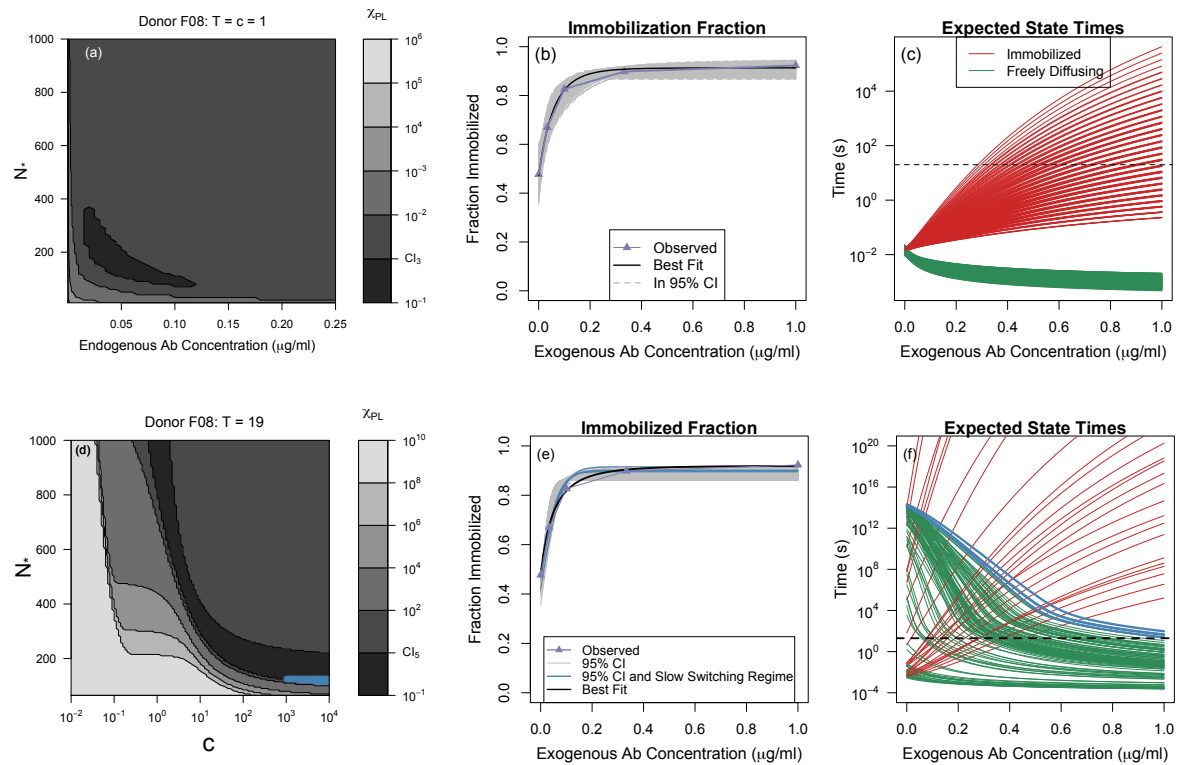

**Figure 7.** (a),(d) Profile likelihood contour plots (Donor F08) for  $\chi_{PL}^2([A]_0, N_*)$  and  $\chi_{PL}^2(c, N_*)$  when  $T = c = 1$  and  $T = 19$ , respectively. Darker shades correspond to smaller profile likelihood values and the black region corresponds to the 95% confidence regions  $\Theta_{0.05,3}$  and  $\Theta_{0.05,5}$ . (b),(e) Predicted Immobilized Fraction curves (gray lines) for  $\theta$  sampled from  $\Theta_{0.05,3}$  and  $\Theta_{0.05,5}$ . The black curve is the prediction of the best fit in each case for Donor F08. The observed Immobilized Fraction is shown by the purple line with triangles. (c),(f) Expected duration of Immobilized (red curves) and Freely-Diffusing (green curves) states for  $\theta$  sampled from  $\Theta_{0.05,3}$  and  $\Theta_{0.05,5}$ . When  $T = c = 1$ , frame (c), none of predicted state times are above 20 seconds, horizontal black line. On the other hand, when  $T = 19$ , frame (f), there are some parameter combinations that do yield slow switching. These are marked in light blue as appropriate in Panels (d)-(f).

535 **3.3. Threshold and binding cascade parameters allow slow switching.** By allowing  
 536 the immobilization process to require multiple cross-linking antibodies,  $T > 1$ , and for the  
 537 Ab-mucin dynamics to be state-dependent,  $c \neq 1$ , we found both that (1) the subset of  
 538 parameters that lead to slow switching is non-empty ( $\Theta_{\text{slow}} \neq \emptyset$ ), and (2) there is an overlap  
 539 between slow-switching parameters and parameters that fit the Immobilized Fraction data

540 well ( $\Theta_{0.05,5} \cap \Theta_{\text{slow}} \neq \emptyset$ ). For example, in Figure 7 panels (d)-(f) we demonstrate this fact  
 541 assuming  $T = 19$  for Donor F08. The  $2d$  profile likelihood plot in panel (d) shows an inverse  
 542 relationship between  $N_*$  and the cascade factor  $c$ . Again the black region corresponds to  
 543 all  $(c, N_*)$  pairs that appear in  $\Theta_{0.05,5}$ . For a uniform sample of such pairs, in panel (e) we  
 544 display the Immobilized Fraction predictions, and in panel (f) the corresponding expected  
 545 immobilization and diffusion state durations. Only a small subset of  $\Theta_{0.05,5}$  allows for slow  
 546 switches. We mark this subset in blue in all three panels. Notably, conditioned on  $T = 19$ , we  
 547 have that  $N_* \leq 120$ , which is somewhat smaller than the typical estimate for  $N_*$ . In the next  
 548 section we note that assuming higher values for  $T$  leads to higher allowable values for  $N_*$ .  
 549 This type of result holds for all donors: for sufficiently high assumed  $T$ , the corresponding  
 550 parameters sets  $\Theta_{0.05,5}$  and  $\Theta_{\text{slow}}$  overlap.

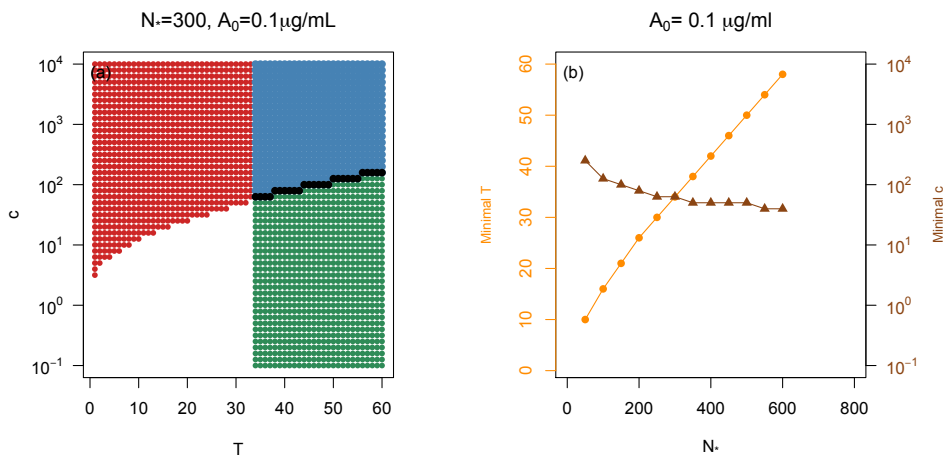

**Figure 8.** (a) Parameter combinations of  $T$  and  $c$  that predict expected immobilized times greater than 20s, red points, and predict expected freely-diffusing times greater than 20s, green points, assuming  $N_* = 300$  and  $[A]_0 = 0.1\mu\text{g/mL}$ . The overlapping  $(T, c)$  combinations (blue points) are those combinations that satisfy slow switching condition and subset  $(T, c_{\text{min}})$  are denoted by black. (b) The minimal value of  $T$  required for our model to predict slow switching as a function of  $N_*$ , orange curve. Given an  $N_*$  and corresponding minimal  $T$  pair, the minimal value of  $c$  required for our model to predict slow switching is denoted by the brown curve. The endogenous Ab concentration is fixed at  $[A]_0 = 0.1\mu\text{g/mL}$ .

551 By testing over a range of  $\vec{\theta} = (T, c, N_*, [A]_0)$ , we uncovered some relationships among the  
 552 components of the parameter vectors  $\vec{\theta}$  that yield slow switching  $\Theta_{\text{slow}}$ . We first investigated  
 553 the relationship between  $T$  and  $c$  by fixing  $N_*$  and  $[A]_0$ . Noting that  $\mathbb{E}_{\theta}(\tau)$  is independent  
 554 of  $c$  and  $\mathbb{E}_{\theta}(\sigma)$  is an increasing function in  $c$ , we calculated the minimal  $c$  required to satisfy  
 555 the slow switching condition, labeling this value  $c_{\text{min}}$ . Though we could not obtain an explicit  
 556 relationship between  $T$  and  $c_{\text{min}}$ , we found that virions with a large immobilization threshold  
 557  $T$  can only satisfy the slow switching condition if there is a corresponding large cascade  
 558 effect, large  $c_{\text{min}}$ . To visualize this, in Figure 8(a) we display the parameter combinations  
 559 of  $(T, c, N_* = 300, [A]_0 = 0.1)$  that yield  $\mathbb{E}_{\theta}(\tau) > 20$  (green) and  $\mathbb{E}_{\theta}(\sigma) > 20$  (red) for all  
 560 exogenous antibody concentrations between 0 and  $1\mu\text{g/mL}$ . The overlapping region (blue

561 points) corresponds to  $\theta \in \Theta_{\text{slow}}$  and the combinations of interest  $(T, c_{\text{min}})$  are shown in  
 562 black.

563 We draw the conclusion that if  $N_* = 300$ , then  $T$  must be at least 34 and  $c$  must be at  
 564 least 63. If we increase the assumption about  $N_*$  while keeping  $[A]_0$  fixed, then we found  
 565 that the minimal allowable  $T$  and  $c$  for slow switching increase and decrease, respectively.  
 566 We demonstrate this relationship in Figure 8(b). For  $[A]_0 = 0.1\mu\text{g/mL}$ , the orange (circles)  
 567 curve corresponds to the minimal  $T$  value (left  $y$ -axis) for the given  $N_*$  ( $x$ -axis) required such  
 568 that  $\vec{\theta} \in \Theta_{\text{slow}}$  where  $[A]_0 = 0.1\mu\text{g/mL}$ . The brown (triangles) curve denotes the minimal  $c$   
 569 value (right  $y$  axis) required for the given  $N_*$ , minimal  $T$ , and  $[A]_0 = 0.1\mu\text{g/mL}$  to result in  
 570 expected state times longer than 20 seconds.

571 **3.4. Model with threshold and binding cascade parameter is unidentifiable.** As implied  
 572 by the results in the preceding section, we found that the introduction of  $T > 1$  and  $c \neq 1$   
 573 resulted in issues with identifiability. That is to say, it appears that the confidence region  
 574  $\Theta_{0.05,5}$  is infinite even when restricted to the subspace  $\Theta_{0.05,5} \cap \Theta_{\text{slow}}$ . We use the Immobilized  
 575 Fraction data for Donor F08 to demonstrate this fact but provide information for each Donor in  
 576 the Supplementary Information. Throughout this section we will use the terminology defined  
 577 in subsection 2.6.

578 Over the full parameter space  $\Theta$ , the 1d profile likelihoods revealed that all three of  
 579 the parameters  $T$ ,  $c$ , and  $N_*$  are practically unidentifiable over the range we tested. The  
 580 profile likelihoods are displayed in black in Figure 9(a)-(c). When we profiled the parameters  
 581  $T$ ,  $c$ , and  $N_*$  restricted to the Slow Switching Regime  $\Theta_{0.05,5} \cap \Theta_{\text{slow}}$ , we found  $T$  is still  
 582 practically unidentifiable over the range  $T \geq 19$ , while  $c$  is practically unidentifiable a large  
 583 range of positive values. The number of binding sites  $N_*$  does seem to be identifiable, with a  
 584 deep valley centered around the unique minimum at approximately  $N_* = 120$ . These profile  
 585 likelihoods are represented in blue in Figure 9(a)-(c). The dashed lines correspond to the  
 586 95% confidence interval boundaries for each parameter. Since the blue curves are below the  
 587 confidence interval we can say that there exist parameter combinations in the Slow Switching  
 588 Regime that reasonably fit the Immobilized Fraction data in Figure 9(e).

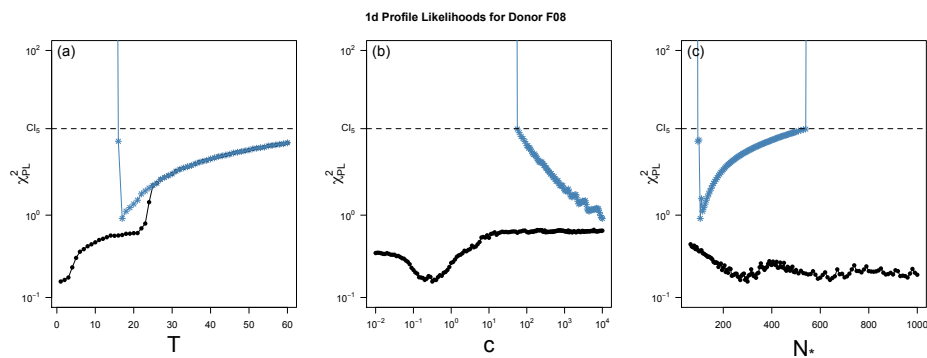

**Figure 9.** (a)- (c) The 1d profile likelihoods for the parameters: immobilization threshold  $T$ , cascade factor  $c$ , and number of Ab binding sites on the virion  $N_*$ , respectively over all tested parameter combinations (black curves) and when restricted to the slow switching regime (blue curves). The 95% confidence interval for each parameter consists of those parameter values with profile likelihood values below the dashed line.

589 **4. Discussion.** We have developed mathematical models and statistical methods to ana-  
590 lyze the behavior of HSV virions diffusing in CVM in the presence of various concentrations of  
591 cross-linking Ab. With a few exceptions, we found that particle paths can be partitioned into  
592 two basic categories: Freely Diffusing and Immobilized. While the fraction of Immobilized  
593 virions increases with Ab concentration, we found that the mobility of the Freely Diffusing  
594 class is not Ab-concentration dependent.

595 Because we expect all the individual bonds to be reversible, virions should switch between  
596 the Freely Diffusing and Immobilized states. Previously, it had been hypothesized that such  
597 switches are rapid with respect to the experimental time scale, but our analysis contradicts  
598 that assumption. This raises the question of whether or not it is possible for the basic kinetic  
599 model to produce “slow-switching” paths where switches occur on a time scale much larger  
600 than the experimental time window. We found that this is possible if the model allows for a  
601 lower bound on the number of Ab necessary to immobilize a virion and assuming a “cascade  
602 effect” in Ab-mucin binding that encourages entanglement.

603 Introducing these extra features leads to a fundamental issue with unidentifiability in the  
604 statistical analysis. We can make claims like “the minimum number of antibodies needed  
605 to immobilize a virion must be greater than 20 or so”, but we cannot be more specific. In  
606 order to do so, we would need to have access to time series that are much longer than what  
607 is currently experimentally feasible.

608 While we have shown that it is possible for reversible kinetics to be consistent with the  
609 path data, it might also be possible to explain the data with a model that assume all binding  
610 events are irreversible. Unfortunately the available data cannot distinguish between the two  
611 models. One possible resolution is to conduct experiments that explicitly control for the  
612 time between the introduction of Ab to the virion population and the observation of virion  
613 trajectories. Based on our model, in which we assume the immobilization process is reversible  
614 prior to the system reaching stationarity, switching should be more common when the number  
615 of antibodies bound to surface epitopes is low. Therefore, starting the tracking immediately  
616 enhances the probability of observing state switches before any long-lasting immobilization  
617 events occur.

618 On the other hand, observing virions at different time points long after Ab introduction  
619 will help determine whether or not the system reaches a stationary distribution. If so, there  
620 should be substantial information in analyzing how (or if) that stationary distribution depends  
621 on the Ab concentration, and the rate at which that stationary distribution is achieved.

622 The statistical methods and mathematical model introduced here apply to a broad class  
623 of biological systems that are composed of distinct subpopulations. Our classification scheme  
624 based on path-by-path analysis detects subpopulation dynamics that can be masked when  
625 considering only overall ensemble behavior. Clustering and then analyzing subpopulation  
626 ensemble statistics provides insight on the way the proportion and dynamics of these subpop-  
627 ulation change in response to the environmental factors. The model proposed in [subsection 2.4](#),  
628 can be modified to describe the general scenario when nanoparticles work to entrap a diffusing  
629 pathogen by anchoring the pathogen to the surrounding environment.

630 **Appendix A. Derivation of the MLE for D.** From the defining properties of Brownian  
631 motion, the likelihood function of 2d Brownian motion defined by  $d\mathbf{X}(t) = \sqrt{2D}d\mathbf{W}(t)$  has

632 form  
633

$$634 \quad (A.1) \quad L(D; u, v) = \left( \frac{1}{4\pi\delta D} \right)^n \exp \left( - \sum_{k=1}^n \frac{(X(k\delta) - X((k-1)\delta))^2}{4D\delta} \right) \\ 635 \quad \quad \quad \times \exp \left( - \sum_{k=1}^n \frac{(Y(k\delta) - Y((k-1)\delta))^2}{4D\delta} \right). \\ 636$$

637 In terms of the increment process,  $U(k\delta)$  and  $V(k\delta)$ , the loglikelihood is

$$638 \quad (A.2) \quad \ell(D) = -n(\log(4\pi\delta) + \log(D)) - \frac{1}{4D\delta} \sum_{k=1}^n (U(k\delta)^2 + V(k\delta)^2).$$

639 Solving the likelihood equation  $\frac{d}{dD}\ell(D) = 0$ , the ML estimator for  $D$  is given by

$$640 \quad (A.3) \quad \hat{D}_{MLE} = \frac{1}{4\delta n} \sum_{k=1}^n (U(k\delta)^2 + V(k\delta)^2).$$

641 **Appendix B. Mathematical Model in subsection 2.4.** We arrive at our approximation  
642 to the probability of immobilization Equation (2.10) presented in subsection 2.4 by averaging  
643 over the transitions of the number of antibodies simultaneously bound to the virion,  $S(t)$ .  
644 To do this, we consider a simplified model in which the Ab-mucin binding rate is the same  
645 for both an immobilized virion and freely diffusing virion. That is the function defined in  
646 Equation (2.9) is constant,  $g(s) \equiv c$ . In this case, let  $S(t)|_{n,c}$  denote the Markov chain with  
647 transition rates:

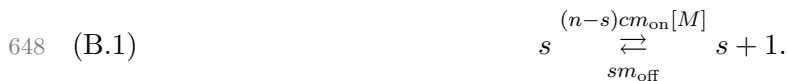

649 First, we derive the stationary distribution for the number of bound antibodies,  $N(t)$ , and the  
650 conditional number of simultaneously bound antibodies assuming  $g(s) \equiv c$ ,  $S(t)|_{n,c}$ . Then we  
651 compute the expected duration of the Immobilized state and the Freely-Diffusing state of a  
652 virion from those quantities assuming  $g(s) \equiv c$ . Finally, we obtain Equation (2.10) using the  
653 results of the previous two steps.

654 **B.1. Stationary distribution of the two processes  $N(t)$  and  $S(t)|_{n,c}$ .** We model the  
655 two processes  $N(t)$  and  $S(t)|_{n,c}$  as CTMC with transition rates given by Equation (2.7) and  
656 Equation (B.1), respectively. Because they are irreducible Markov chains with a finite state  
657 space, there exists a unique stationary distribution, and convergence is exponential. Under  
658 the assumption that the Ab-binding sites on the surface of a virion operate independently, the  
659 process  $N(t)$  follows a binomial distribution with  $N_*$  trials and a time dependent success prob-  
660 ability. Evoking a classical result from Renewal Theory, the steady state success probability  
661 is given by the long run fraction of being in the bound state, so that

$$662 \quad (B.2) \quad \lim_{t \rightarrow \infty} N(t) \sim \text{Binom} \left( \frac{k_{\text{on}}A}{k_{\text{off}} + k_{\text{on}}A}, N_* \right).$$

663 By assuming  $g(s) \equiv c$ , each antibody bound to the virion interacts with the mucin fibers  
 664 independently, so that  $S(t)|_{n;c}$  is a binomial random variable with  $n$  trials and time dependent  
 665 success probability. It follows from the same reasoning as above, that

$$666 \quad (\text{B.3}) \quad \lim_{t \rightarrow \infty} S(t)|_{n;c} \sim \text{Binom}\left(\frac{cm_{\text{on}}M}{m_{\text{off}} + cm_{\text{on}}M}, n\right)$$

667 is the unique stationary distribution.

668 **B.2. Expected duration of the Freely-Diffusing and Immobilized states.** We derive  
 669 the expected duration of the Freely-Diffusing state,  $\tau$ , and Immobilized states,  $\sigma$ , of a virion  
 670 by considering the simplified model when the number of simultaneous bound antibodies has  
 671 transition rates Equation (B.1).

672 We introduce the following notation  $\tau_{T;c}$  and  $\sigma_{T;c}$  denote the expected time the process  
 673  $S_{n;c}$  spends in the freely diffusing state and immobilized state, respectively. The expected  
 674 duration of the Freely-Diffusing state,  $S_{n;c}(t) < T$ , is simply the expected hitting time of state  
 675  $T$ , given  $S_{n;c}$  starts with  $T - 1$  simultaneously bound antibodies. By solving a system of linear  
 676 equations for the vector of expecting hitting times of state  $T$ , see [12], yields

$$677 \quad \mathbb{E}(S_{n;c}(t) = T | S_{n;c}(0) = T - 1) = \frac{1}{(n-T+1)m_{\text{on}}[M]b(T-1;n, \frac{m_{\text{on}}M}{m_{\text{off}}+m_{\text{on}}[M]})} \sum_{s=0}^{T-1} b(s; n; \frac{m_{\text{on}}[M]}{m_{\text{off}}+m_{\text{on}}[M]}).$$

678 Similarly, the expected duration of the Immobilized state,  $S_{n;c}(t) \geq T$ , is the expected hitting  
 679 time of state  $T - 1$  given  $S_{n;c}$  starts in state  $T$ . By solving a system of linear equations for  
 680 the vector of expecting hitting times of state  $T - 1$ ,

$$681 \quad (\text{B.5}) \quad \mathbb{E}(S_{n;c}(t) = T - 1 | S_{n;c}(0) = T) = \frac{1}{Tm_{\text{off}}b(T;n, \frac{m_{\text{on}}[M]}{m_{\text{off}}+m_{\text{on}}[M]})} \sum_{s=T}^n b(s; n; \frac{m_{\text{on}}[M]}{m_{\text{off}}+m_{\text{on}}[M]}).$$

682 We observe that the transition rates of a Freely Diffusing virion are the same as a virion  
 683 modeled by the simplified transition rates given by Equation (B.1), specifically for  $c = 1$ . The  
 684 transition rates of an immobilized virion are the same as a virion modeled by the simplified  
 685 transition rates Equation (B.1). Hence, the following equalities hold

$$686 \quad \mathbb{E}(\sigma; T, c, n) = \mathbb{E}(\sigma_{T;c}; T, c, n) \quad \text{and} \quad \mathbb{E}(\tau; T, c, n) = \mathbb{E}(\tau_{T;1}; T, 1, n).$$

687 Explicitly, the duration of the Freely-diffusing state and the Immobilized state of a virion are  
 688 given by

$$689 \quad (\text{B.6}) \quad \mathbb{E}(\tau_{T;c}; T, c, n) = \frac{1}{(n-T+1)m_{\text{on}}M} \left( \frac{\sum_{s=0}^{T-1} \binom{n}{s} \left(\frac{m_{\text{on}}M}{m_{\text{off}}+m_{\text{on}}M}\right)^s \left(\frac{m_{\text{off}}}{m_{\text{off}}+m_{\text{on}}M}\right)^{n-s}}{\binom{n}{T-1} \left(\frac{m_{\text{on}}M}{m_{\text{off}}+m_{\text{on}}M}\right)^{T-1} \left(\frac{m_{\text{off}}}{m_{\text{off}}+m_{\text{on}}M}\right)^{n-T+1}} \right)$$

690

$$691 \quad (\text{B.7}) \quad \mathbb{E}(\sigma_{T;c}; T, c, n) = \frac{1}{Tm_{\text{off}}} \left( \frac{\sum_{s=T}^n \binom{n}{s} \left(\frac{cm_{\text{on}}M}{m_{\text{off}}+cm_{\text{on}}M}\right)^s \left(\frac{m_{\text{off}}}{m_{\text{off}}+cm_{\text{on}}M}\right)^{n-s}}{\binom{n}{T} \left(\frac{cm_{\text{on}}M}{m_{\text{off}}+cm_{\text{on}}M}\right)^T \left(\frac{m_{\text{off}}}{m_{\text{off}}+cm_{\text{on}}M}\right)^{n-T}} \right),$$

692 respectively.



693 **B.3. Asymptotic probability of number of bound antibodies.** We are now ready to  
 694 derive our time-scale approximation of the asymptotic probability of immobilization function,  
 695 Equation (2.10). By conditioning on the slow process, the antibody-virion dynamics,

$$\begin{aligned}
 696 \quad \hat{\pi}(A; \theta) &= \lim_{t \rightarrow \infty} \mathbb{P}\{q > 0 \cap \{S(t) \geq T\}\} \\
 697 \quad &= \mathbb{P}\{q > 0\} \lim_{t \rightarrow \infty} \mathbb{P}\{S(t) \geq T | q > 0\} \\
 698 \quad (B.8) \quad &= q \sum_{n=T}^{N_*} \left( \lim_{t \rightarrow \infty} \mathbb{P}\{S(t) \geq T | N(t) = n, q > 0\} \right) \cdot \left( \lim_{t \rightarrow \infty} \mathbb{P}\{N(t) = n\} \right). \\
 699 \quad &
 \end{aligned}$$

700 An application in Renewal Theory leads to the stationary probability of immobilization for  
 701 the conditional process  $S(t)$  of the form

$$702 \quad (B.9) \quad \lim_{t \rightarrow \infty} \mathbb{P}\{S(t) \geq T | N(t) = n, q > 0\} = \frac{\mathbb{E}(\sigma; T, c, n)}{\mathbb{E}(\sigma; T, c, n) + \mathbb{E}(\tau; T, n)}.$$

703 Plugging in the results from Appendix B.1 and Appendix B.2, gives Equation (2.10).

704 **Appendix C. Derivation of likelihoods.** We derive the likelihood of Equation (2.14)  
 705 and Equation (2.15) from the exact solution of the SDEs under the assumptions that the  
 706 switch point,  $\tau$ , occurs at a time measurement, and the true 2d position of the particle is  
 707  $\mathbf{X}(t) = (X(t), Y(t))$ . We denote the time measurement  $t_k = k\delta$  for  $k = 1, \dots, n$ , where  $t_0 = 0$   
 708 and  $t_n = T$ , and  $\mathbf{X}(t_k) = \mathbf{X}_k$ .

709 For the [diffusion  $\rightarrow$  immobilization] model, when  $t > \tau$  the SDE is linear with additive  
 710 noise. Hence a conditional exact solution can be expressed using Duhamel's formula,

$$711 \quad (C.1) \quad \mathbf{X}_k | \mathbf{x}_{k-1} = \begin{cases} \mathbf{x}_{k-1} + \sqrt{2D}(\mathbf{W}_k - \mathbf{W}_{k-1}) & 0 < t_k \leq \tau \\ \mathbf{x}_{k-1} e^{-\tilde{\kappa}\Delta} + (1 - e^{-\tilde{\kappa}\Delta})\mathbf{x}_\tau + \sqrt{2D} \int_{t_{k-1}}^{t_k} e^{-\tilde{\kappa}(t_k-s)} d\mathbf{W}(s) & \tau < t_k \leq T. \end{cases}$$

712 It follows immediately from the definition of Brownian motion and from an application of  
 713 Ito's Isometry,

$$714 \quad (C.2) \quad \mathbf{X}_n | \mathbf{x}_{n-1} \sim \begin{cases} N(\mathbf{x}_{k-1}, 2\delta D) & 0 < t_k \leq \tau \\ N(\rho\mathbf{x}_{k-1} + (1 - \rho)\mathbf{x}_\tau, \frac{D}{\tilde{\kappa}}(1 - \rho^2)) & \tau < t_k \leq T. \end{cases}$$

715 where  $\rho = e^{-\tilde{\kappa}\delta}$ . Because the solutions to SDEs satisfy the Markov Property,  
 716

$$\begin{aligned}
 717 \quad (C.3) \quad L((\mathbf{x}_1, \dots, \mathbf{x}_k)) &= \left( \prod_{k=1}^{\tau} \mathbb{P}_{0, \mathbf{x}_\tau}(\mathbf{X}_k | \mathbf{x}_{k-1} = \mathbf{x}_k) \right) \left( \prod_{k=\tau+1}^n \mathbb{P}_{0, \mathbf{x}_\tau}(\mathbf{X}_k | \mathbf{x}_{k-1} = \mathbf{x}_k) \right) \\
 718 \quad &= \left( \frac{1}{4\pi\delta D} \right)^\tau \left( \frac{\tilde{\kappa}}{2\pi D(1 - \rho^2)} \right)^{n-\tau} \exp \left( \frac{-1}{4\delta D} \sum_{k=1}^{\tau} ((X_k - X_{k-1})^2 + (Y_k - Y_{k-1})^2) \right) \\
 719 \quad &\times \exp \left( \frac{-\tilde{\kappa}}{2D(1 - \rho^2)} \sum_{k=\tau+1}^n \left( (X_k - \rho X_{k-1} - (1 - \rho)x_\tau)^2 + (Y_k - \rho Y_{k-1} - (1 - \rho)y_\tau)^2 \right) \right). \\
 720 \quad &
 \end{aligned}$$

721 The likelihood equation for the [immobilization  $\rightarrow$  diffusion] switching model derivation  
722 is similar to that [diffusion  $\rightarrow$  immobilization] switching model but now we assume the im-  
723 mobilized particle is centered around the origin. Under the same reasoning as above  
724

$$\begin{aligned} 725 \text{ (C.4)} \quad L((\mathbf{x}_1, \dots, \mathbf{x}_n)) &= \left( \prod_{i=1}^{\tau} \mathbb{P}_{0, \mathbf{x}_\tau}(\mathbf{X}_k | \mathbf{x}_{k-1} = \mathbf{x}_k) \right) \left( \prod_{i=\tau+1}^n \mathbb{P}_{0, \mathbf{x}_\tau}(\mathbf{X}_k | \mathbf{x}_{k-1} = \mathbf{x}_k) \right) \\ 726 &= \left( \frac{\tilde{\kappa}}{2\pi D(1-\rho^2)} \right)^\tau \exp \left( \frac{-\tilde{\kappa}}{2D(1-\rho^2)} \sum_{n=1}^{\tau} \left( (X_k - \rho X_{k-1})^2 + (Y_k - \rho Y_{k-1})^2 \right) \right) \\ 727 &\quad \times \left( \frac{1}{4\pi\delta D} \right)^{n-\tau} \exp \left( \frac{-1}{4\delta D} \sum_{k=\tau+1}^n \left( (X_k - X_{k-1})^2 (Y_k - Y_{k-1})^2 \right) \right). \end{aligned}$$

729 **Acknowledgments.** The authors would like to thank Jay Newby, John Fricks, and Michelle  
730 Lacey for the helpful conversations that contributed to the development of this work.

731

## REFERENCES

- 732 [1] J. BERNSTEIN AND J. FRICKS, *Analysis of single particle diffusion with transient binding using particle*  
733 *filtering*, Journal of Theoretical Biology, 401 (2016), pp. 109–121.
- 734 [2] A. CHEN, S. A. MCKINLEY, S. WANG, F. SHI, P. J. MUCHA, M. G. FOREST, AND S. K. LAI, *Transient*  
735 *antibody-mucin interactions produce a dynamic molecular shield against viral invasion*, Biophysical  
736 Journal, 106 (2014), pp. 2028–2036.
- 737 [3] M. R. D'ORSOGNA AND T. CHOU, *Optimal cytoplasmic transport in viral infections*, PLoS One, 4 (2009),  
738 p. e8165.
- 739 [4] B. EFRON AND R. J. TIBSHIRANI, *An introduction to the bootstrap*, CRC press, 1994.
- 740 [5] M. C. EISENBERG AND M. A. HAYASHI, *Determining identifiable parameter combinations using subset*  
741 *profiling*, Mathematical Biosciences, 256 (2014), pp. 116–126.
- 742 [6] I. GOYCHUK, V. O. KHARCHENKO, AND R. METZLER, *How molecular motors work in the crowded*  
743 *environment of living cells: coexistence and efficiency of normal and anomalous transport*, PLoS One,  
744 9 (2014), p. e91700.
- 745 [7] D. HOLCMAN AND Z. SCHUSS, *Time scale of diffusion in molecular and cellular biology*, Journal of Physics  
746 A: Mathematical and Theoretical, 47 (2014), p. 173001.
- 747 [8] L. KAUFMAN AND P. J. ROUSSEUW, *Finding groups in data: an introduction to cluster analysis*, vol. 344,  
748 John Wiley & Sons, 2009.
- 749 [9] H. MATSUDA, G. G. PUTZEL, V. BACKMAN, AND I. SZLEIFER, *Macromolecular crowding as a regulator*  
750 *of gene transcription*, Biophysical Journal, 106 (2014), pp. 1801–1810.
- 751 [10] S. A. MCKINLEY, A. CHEN, F. SHI, S. WANG, P. J. MUCHA, M. G. FOREST, AND S. K. LAI, *Modeling*  
752 *neutralization kinetics of hiv by broadly neutralizing monoclonal antibodies in genital secretions coating*  
753 *the cervicovaginal mucosa*, PLoS One, 9 (2014), p. e100598.
- 754 [11] J. NEWBY, J. L. SCHILLER, T. WESSLER, J. EDELSTEIN, M. G. FOREST, AND S. K. LAI, *A blueprint*  
755 *for robust crosslinking of mobile species in biogels with weakly adhesive molecular anchors*, Nature  
756 Communications, 8 (2017), p. 833.
- 757 [12] J. R. NORRIS, *Markov chains*, vol. 2, Cambridge university press, 1998.
- 758 [13] S. S. OLMSTED, J. L. PADGETT, A. I. YUDIN, K. J. WHALEY, T. R. MOENCH, AND R. A. CONE,  
759 *Diffusion of macromolecules and virus-like particles in human cervical mucus*, Biophysical Journal,  
760 81 (2001), pp. 1930–1937.
- 761 [14] W. H. PRESS, S. A. TEUKOLSKY, W. T. VETTERLING, AND B. P. FLANNERY, *Numerical recipes in*  
762 *Fortran 90*, vol. 2, Cambridge university press Cambridge, 1996.
- 763 [15] H. QIAN, M. P. SHEETZ, AND E. L. ELSON, *Single particle tracking. analysis of diffusion and flow in*  
764 *two-dimensional systems*, Biophysical Journal, 60 (1991), pp. 910–921.

- 765 [16] A. RAUE, C. KREUTZ, T. MAIWALD, J. BACHMANN, M. SCHILLING, U. KLINGMÜLLER, AND J. TIMMER,  
766 *Structural and practical identifiability analysis of partially observed dynamical models by exploiting*  
767 *the profile likelihood*, *Bioinformatics*, 25 (2009), pp. 1923–1929.
- 768 [17] W. N. VENABLES AND B. D. RIPLEY, *Modern applied statistics with S-PLUS*, Springer Science & Business  
769 Media, 2013.
- 770 [18] Y.-Y. WANG, A. KANNAN, K. L. NUNN, M. A. MURPHY, D. B. SUBRAMANI, T. MOENCH, R. CONE, AND  
771 S. K. LAI, *IgG in cervicovaginal mucus traps HSV and prevents vaginal herpes infections*, *Mucosal*  
772 *Immunology*, 7 (2014), pp. 1036–1044.
- 773 [19] Y.-Y. WANG, K. L. NUNN, D. HARIT, S. A. MCKINLEY, AND S. K. LAI, *Minimizing biases associated*  
774 *with tracking analysis of submicron particles in heterogeneous biological fluids*, *Journal of Controlled*  
775 *Release*, 220 (2015), pp. 37–43.
- 776 [20] T. WESSLER, A. CHEN, S. A. MCKINLEY, R. CONE, M. G. FOREST, AND S. K. LAI, *Using computational*  
777 *modeling to optimize the design of antibodies that trap viruses in mucus*, *ACS Infectious Diseases*, 2  
778 (2015), pp. 82–92.
- 779 [21] J. WITTEN AND K. RIBBECK, *The particle in the spider’s web: transport through biological hydrogels*,  
780 *Nanoscale*, 9 (2017), pp. 8080–8095.
- 781 [22] B. YANG, A. SCHAEFER, Y.-Y. WANG, J. MCCALLEN, P. LEE, J. M. NEWBY, H. ARORA, P. A.  
782 KUMAR, L. ZEITLIN, K. J. WHALEY, ET AL., *Zmapp reinforces the airway mucosal barrier against*  
783 *ebola virus*, *The Journal of infectious diseases*, (2018), p. jiy230.
